# Supplementary material for: Doping-induced structural phase transition in cobalt diselenide enables enhanced hydrogen evolution catalysis
Source: PubMed Central journal article supplement (PMC6023930; doi:10.1038/s41467-018-04954-7), 2018-06-28
Supplement: 41467_2018_4954_MOESM1_ESM.pdf [file 41467_2018_4954_MOESM1_ESM.pdf]

Supplementary Information

**Doping-induced structural phase transition in cobalt diselenide enables enhanced hydrogen evolution catalysis**

Zheng et al.

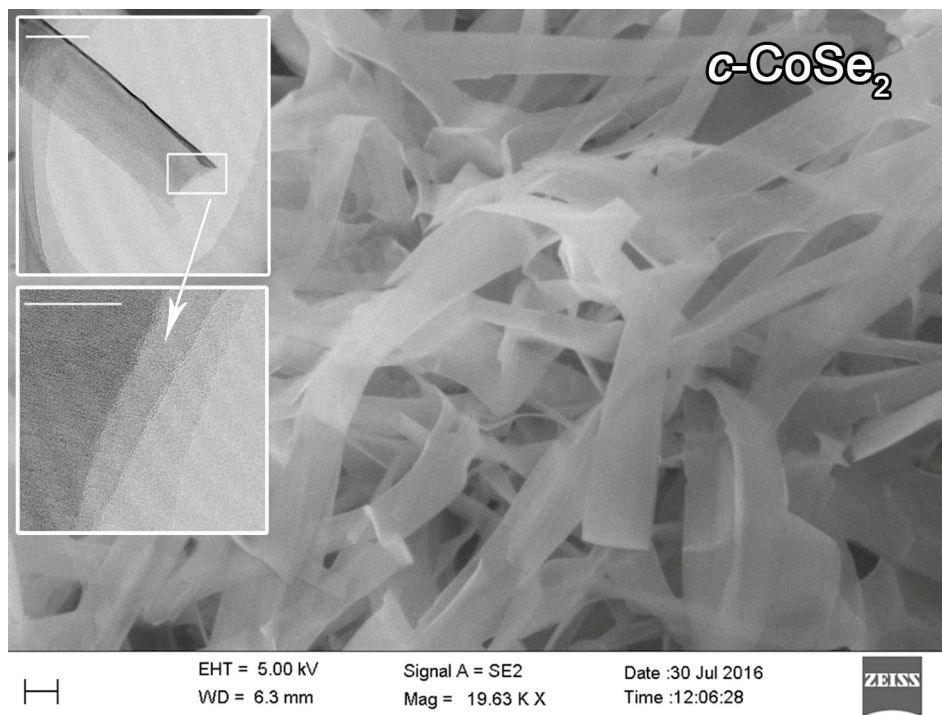

**Supplementary Figure 1. Layered  $c\text{-CoSe}_2$  nanobelts.** SEM image shows the morphology of  $c\text{-CoSe}_2$  nanobelts with widths of 200-800 nm and lengths up to several micrometers. Scale bar: 200 nm. Insets are TEM and HRTEM images that show well-defined multilayered nanostructure along the thickness direction. Scale bars: 200 nm (up) and 20 nm (down).

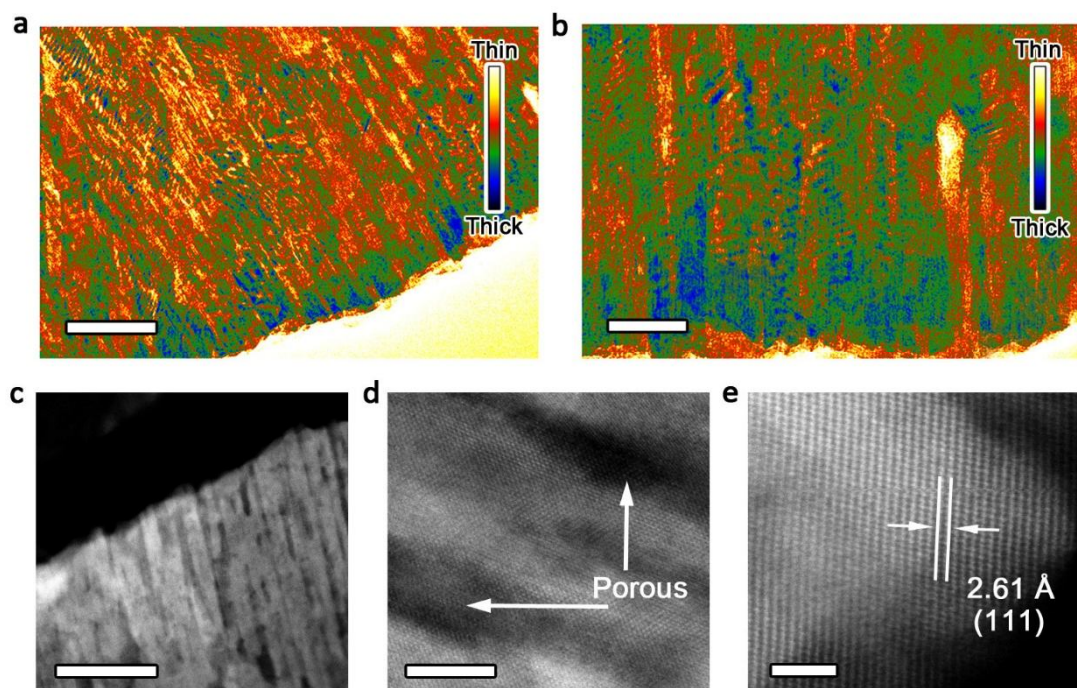

**Supplementary Figure 2. HAADF images of  $o$ -CoSe<sub>2</sub>|P.** **a, b,** False-color HAADF images show the relative thickness of as-prepared  $o$ -CoSe<sub>2</sub>|P. Scale bar, 50 nm. **c-e,** HAADF-STEM images of the  $o$ -CoSe<sub>2</sub>|P catalyst with different magnifications, which show its porous structure and high-crystalline feature. Scale bars: 50, 10, and 2 nm, respectively.

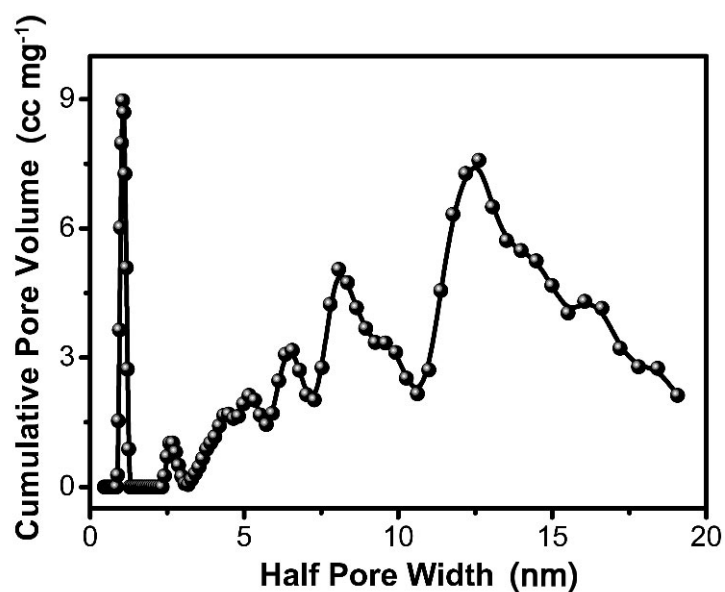

**Supplementary Figure 3.** The pore size distribution curves of *o*-CoSe<sub>2</sub>|P. It shows that the *o*-CoSe<sub>2</sub>|P catalyst possesses a hierarchically porous structure containing multi micropores centered at 1.0 nm and mesopores centered between 6.5 and 15 nm. Such mutiporous structure gives a high surface area, thus rich catalytic active sites for HER catalysis.

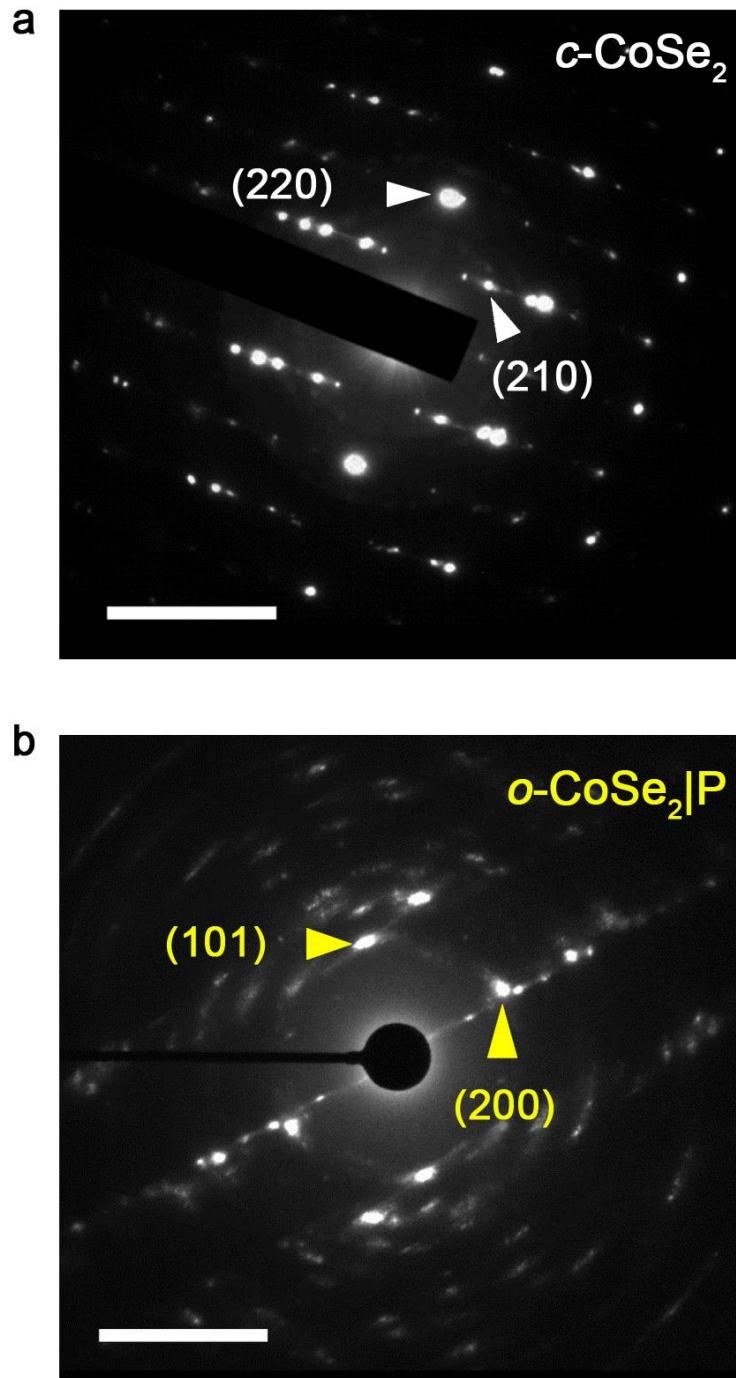

**Supplementary Figure 4. Comparison of SAED patterns between  $c\text{-CoSe}_2$  and  $o\text{-CoSe}_2|\text{P}$ .** **a**, The SAED pattern taken on a typical  $c\text{-CoSe}_2$  nanobelt, which exhibits a cubic structure with single-crystalline character. **b**, The SAED pattern of  $o\text{-CoSe}_2|\text{P}$ . Owing to the high porosity of  $o\text{-CoSe}_2|\text{P}$  nanobelt and the lattice mismatch from the participation of P, the SAED pattern of  $o\text{-CoSe}_2|\text{P}$  displays a quasi-single-crystal feature with slightly stretched diffraction spots. Scale bars: 5  $\text{\AA}^{-1}/\text{nm}$ .

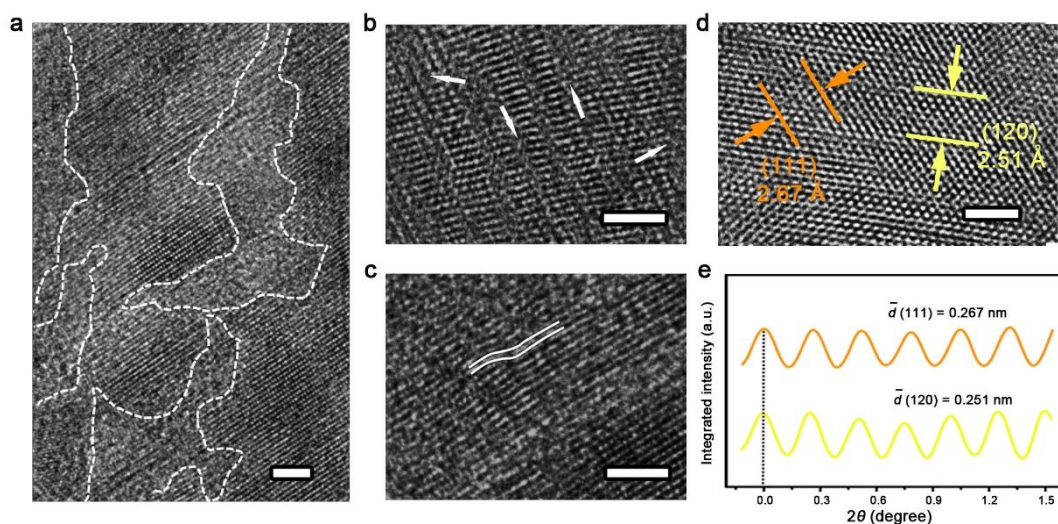

**Supplementary Figure 5. High-resolution TEM (HRTEM) images of *o*-CoSe<sub>2</sub>|P.** **a-c**, HRTEM images of *o*-CoSe<sub>2</sub>|P shows defects around the pore edges. Scale bars, 2 nm. These defects were caused because of the thermal treatment and bonds rotation during phase transition, which creates more active sites and benefits the HER catalysis. **d, e**, HRTEM image of *o*-CoSe<sub>2</sub>|P shows a high-crystalline orthorhombic structure. Scale bar, 2 nm. The orange and yellow curves denote the integrated pixel intensities of spacings along (111) and (120) facets, respectively.



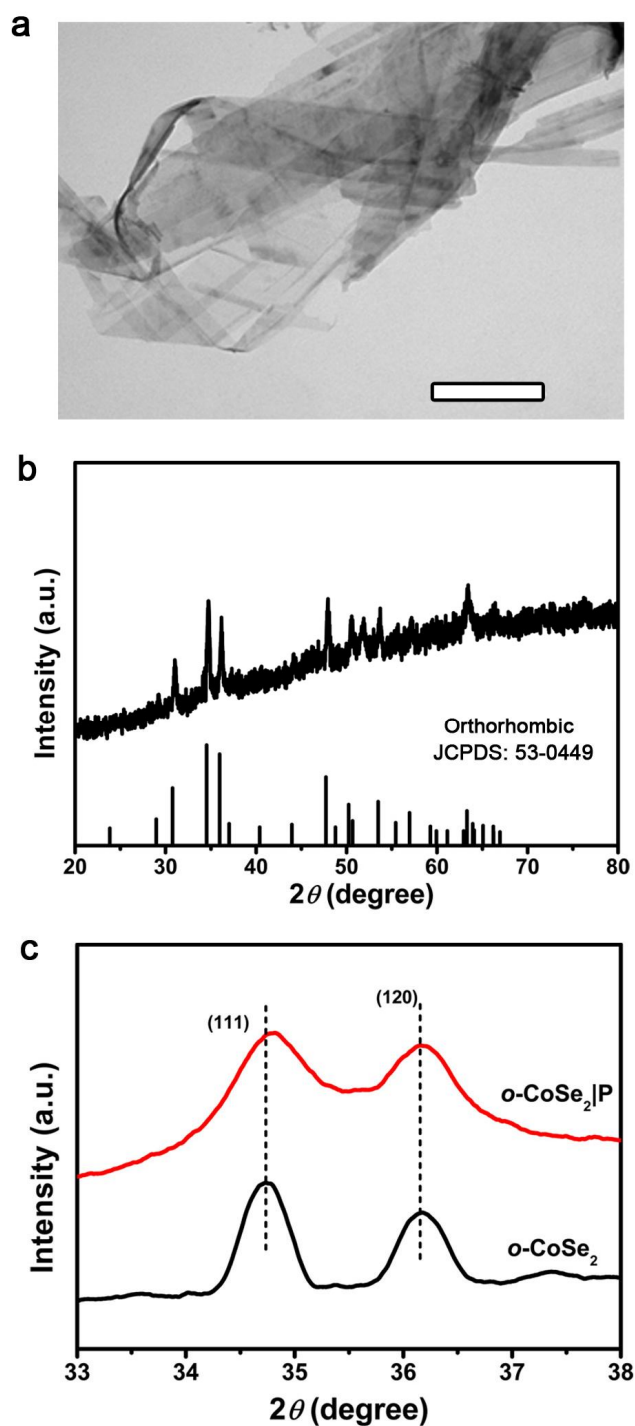

**Supplementary Figure 6. XRD patterns of  $o$ -CoSe<sub>2</sub>|P and  $o$ -CoSe<sub>2</sub>.** **a**, TEM image of the prepared  $o$ -CoSe<sub>2</sub> refer to the previously reported literature<sup>1</sup>. Scale bar, 200 nm; **b**, XRD pattern of  $o$ -CoSe<sub>2</sub> with the standard pattern of the orthorhombic CoSe<sub>2</sub> (JCPDS: 53-0449) as reference. **c**, Selected XRD pattern insets of the (111) and (120) diffraction peaks that compare  $o$ -CoSe<sub>2</sub>|P (red) and  $o$ -CoSe<sub>2</sub> (black). The peak position of  $o$ -CoSe<sub>2</sub>|P shifts to a higher angle indicating smaller P atoms that replace partial bigger Se atoms.

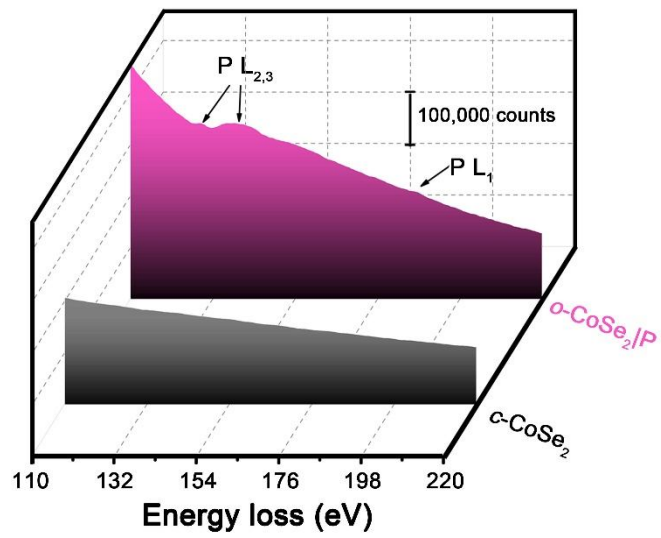

**Supplementary Figure 7. EELS spectra of the *o*-CoSe<sub>2</sub>|P and *c*-CoSe<sub>2</sub>.** *o*-CoSe<sub>2</sub>|P sample shows discernible P peaks that indicates the existence of P dopants. The signals at 128.8/139.2 and 186.7 eV can be assigned  $L_{2,3}$  and  $L_1$  (ref. 2). The P *L*-edge is less pronounced due to the low P content in the *o*-CoSe<sub>2</sub>|P structure.



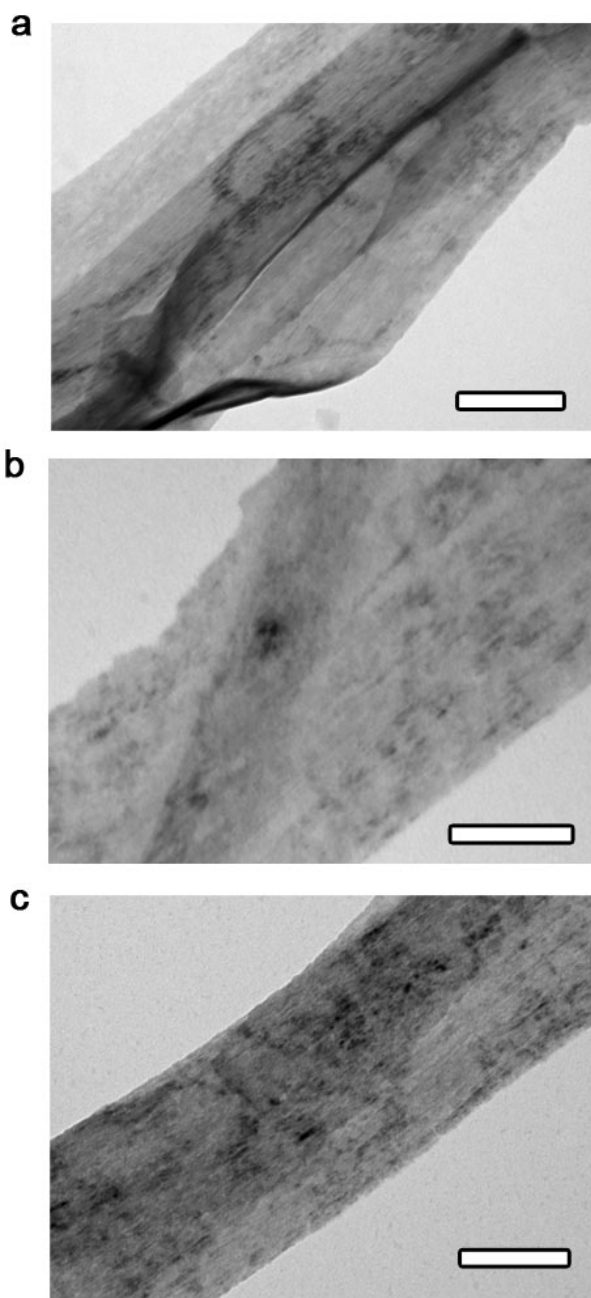

**Supplementary Figure 8. Temperature-dependent experiments.** TEM images of the products obtained at various temperatures: **a**, 300 °C, **b**, 350 °C and **c**, 400 °C. Scale bars, 200 nm, 100 nm and 100 nm, respectively.

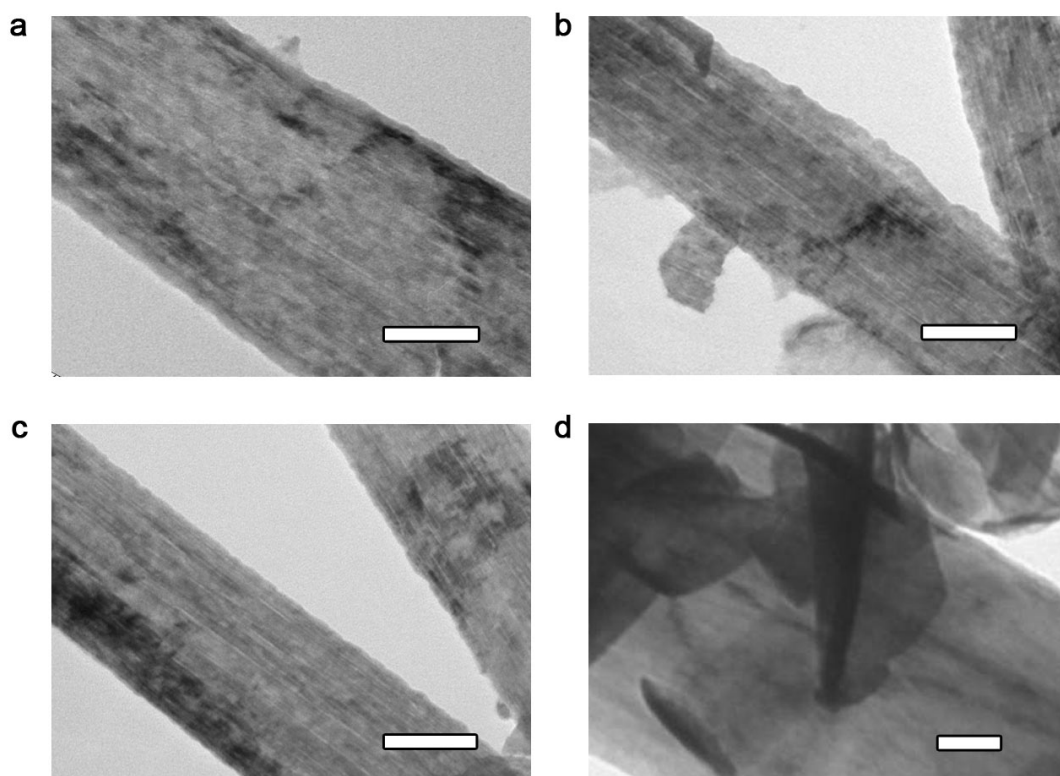

**Supplementary Figure 9. Time-dependent experiments.** TEM images of the products obtained at 400 °C for different times with the same precursor ratio: **a**, 1 h, **b**, 2 h, **c**, 3 h, **d**, 4 h. Scale bar, 100 nm. It shows that longer heating time leads to the disappearance of porous structure because of the Ostwald ripening process.

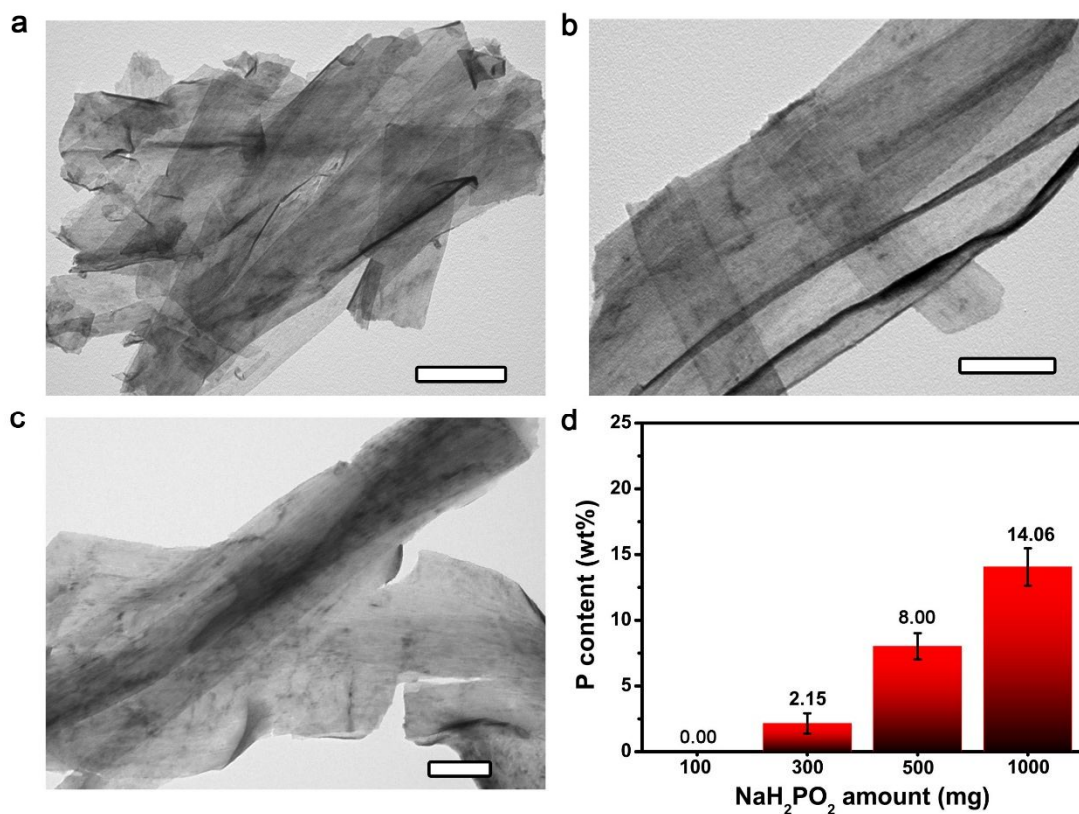

**Supplementary Figure 10. Doping content effect.** TEM images of the products obtained with different amount of P precursor: **a**, 100 mg; scale bar, 500 nm. **b**, 300 mg and **c**, 1 g. Scale bar, 100 nm. **d**, Diagram shows P-doping content of *o*-CoSe<sub>2</sub>|P samples prepared with different amount of P precursor. It seems no significant changes in morphology of *o*-CoSe<sub>2</sub>|P with various P dopants. Moreover, small amount of P precursor such as 100 mg can not generate enough PH<sub>3</sub> that enables the P doping process.

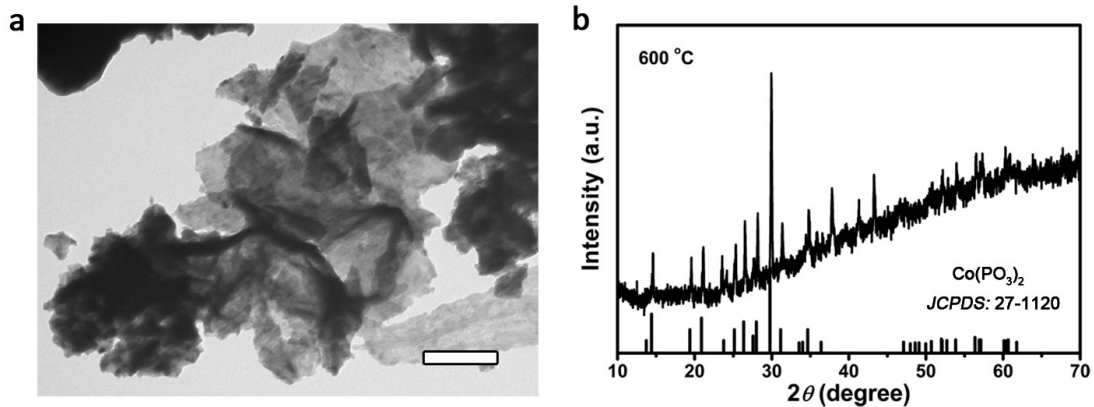

**Supplementary Figure 11. Structural characterization of the product obtained at 600 °C, 30 min with 500 mg P precursor. a,** TEM image of the sample. Scale bar: 200 nm. **b,** XRD pattern of the sample, which was assigned to  $\text{Co}(\text{PO}_3)_2$  (JCPDS: 27-1120). It shows that very high annealed temperature can not allow for the P-doping-induced phase transition in  $\text{CoSe}_2$ .

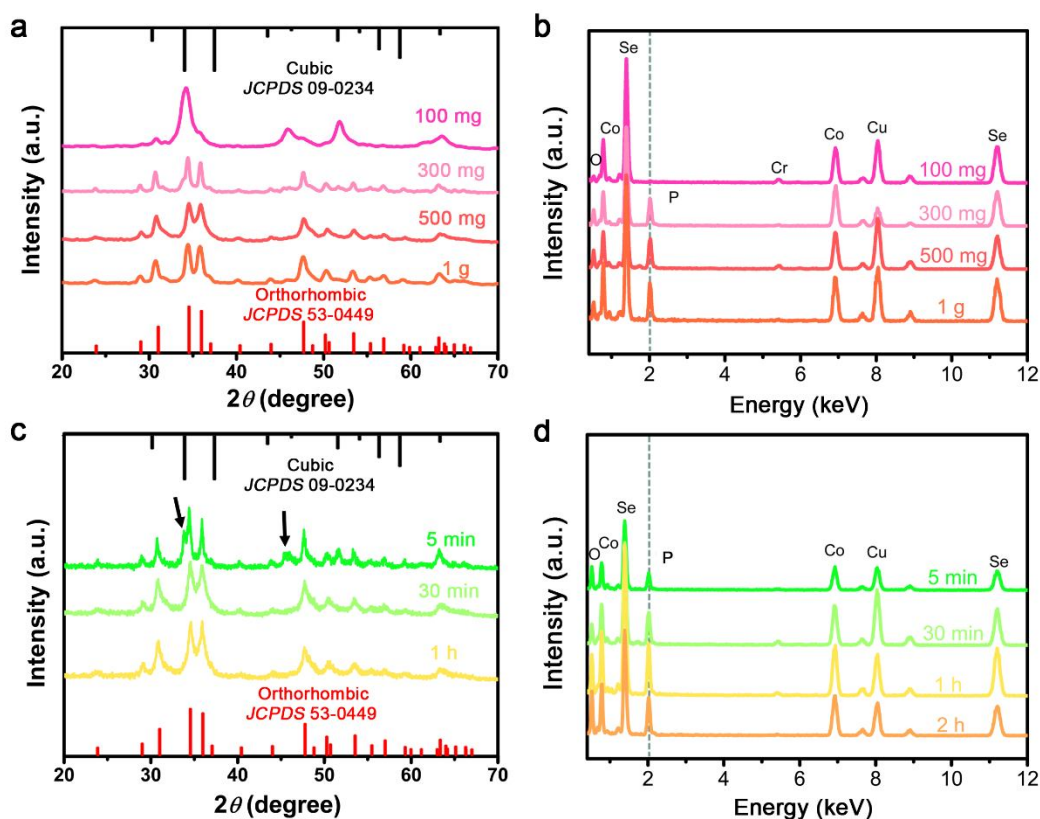

**Supplementary Figure 12. XRD and EDX characterizations.** **a, b,** XRD and EDX spectra of samples prepared with different amounts of P precursor, respectively. **c, d,** XRD and EDX spectra of samples prepared at different reaction times, respectively. It reveals that P can be doped in  $\text{CoSe}_2$  structure only when the offered  $\text{NaH}_2\text{PO}_2 \cdot \text{H}_2\text{O}$  is larger than 100 mg. It also reveals that the phase transition emerges at  $\sim 5$  min when the temperature reaches  $400^\circ\text{C}$ . The phase transition from  $c\text{-CoSe}_2$  to  $o\text{-CoSe}_2|\text{P}$  completed at  $\sim 30$  min. Cu, Cr and O signals in EDX spectra were originated from the sample holder.

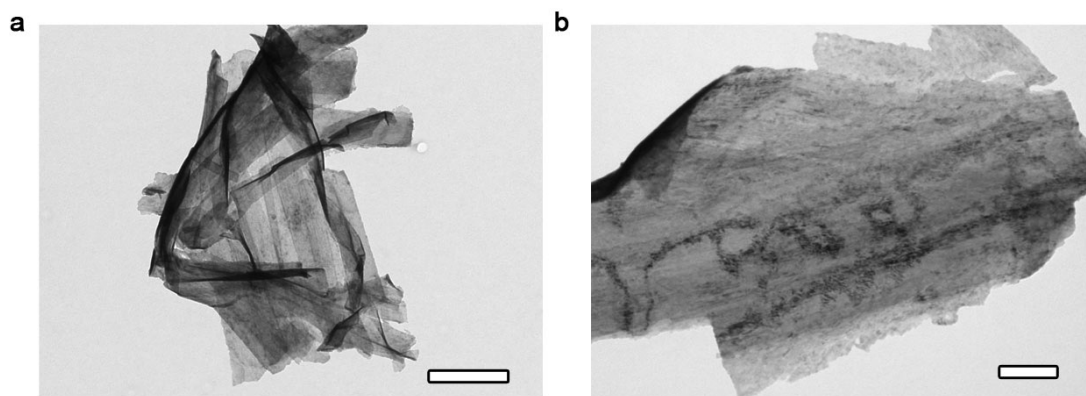

**Supplementary Figure 13. TEM images of annealed  $c$ -CoSe<sub>2</sub> without P doping. a, b,** TEM images of  $c$ -CoSe<sub>2</sub> that has been annealed at 400 °C under Ar flow for 30 min. Scale bars, 500 and 200 nm, respectively. It shows that the phase (see Fig. 2a in Main Text) and morphology maintain if no P precursor was added during the reaction, suggesting the important role of P that enables the structural phase transition from  $c$ -CoSe<sub>2</sub> to  $o$ -CoSe<sub>2</sub>|P.

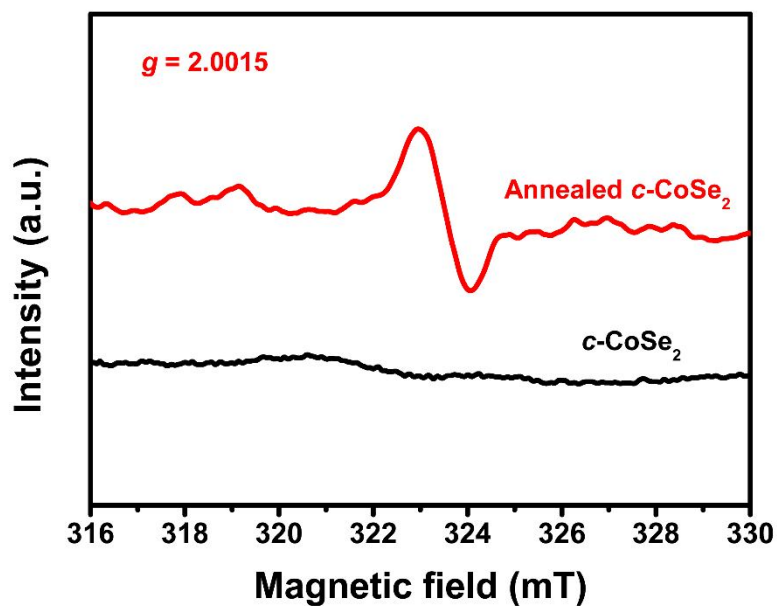

**Supplementary Figure 14. EPR spectra analyses.** Comparison of EPR spectra of *c*-CoSe<sub>2</sub> and annealed *c*-CoSe<sub>2</sub> without P doping at 400 °C under Ar flow. The annealed *c*-CoSe<sub>2</sub> shows a clear EPR signal with a *g* value of 2.0015, accounting for the existence of positively charged Se vacancies, consistent with a previous report<sup>3</sup>.



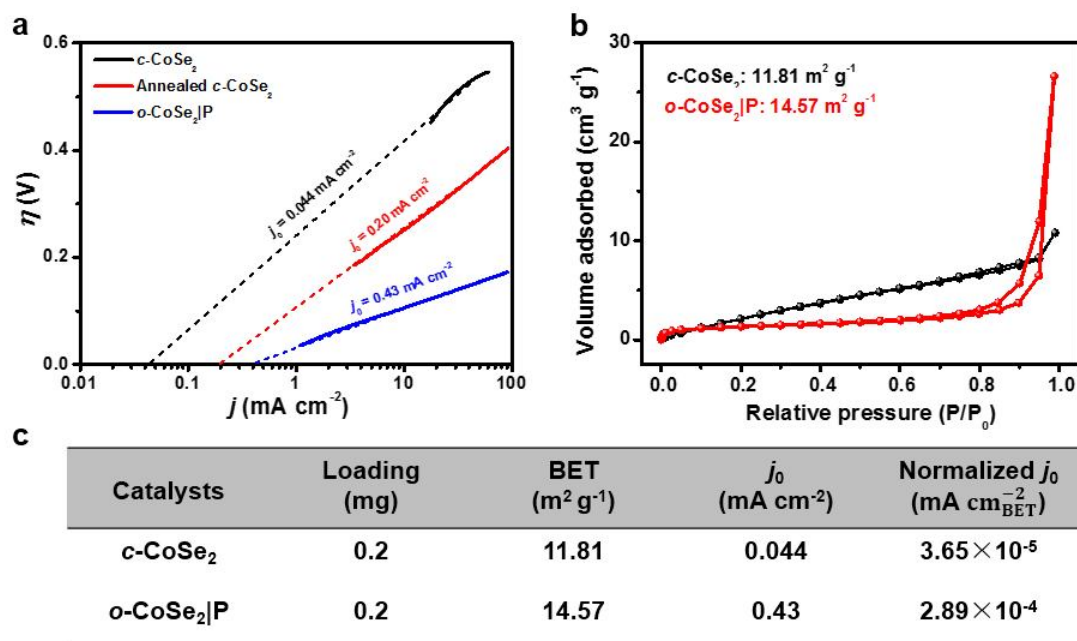

**Supplementary Figure 15. Exchange current density calculation.** **a**, Calculated exchange current densities ( $j_0$ ) for different studied catalysts by using extrapolation methods. The  $j_0$  of  $0.43 \text{ mA cm}^{-2}$  for  $o\text{-CoSe}_2\text{|P}$  catalyst surpasses recently reported single-catalysts, and even many composite catalysts (**Supplementary Tables 1-2**), demonstrating its remarkable HER kinetics in alkali. **b**, BET surface area analysis of  $c\text{-CoSe}_2$  and  $o\text{-CoSe}_2\text{|P}$  catalysts, respectively. **c**, Comparison of BET surface area normalized exchange current densities of  $c\text{-CoSe}_2$  and  $o\text{-CoSe}_2\text{|P}$ , respectively. It reveals that the new  $o\text{-CoSe}_2\text{|P}$  catalyst bears the BET-normalized  $j_0$  of  $2.89 \times 10^{-4} \text{ mA cm}^{-2}$ , which is much larger than that of  $c\text{-CoSe}_2$  catalyst.

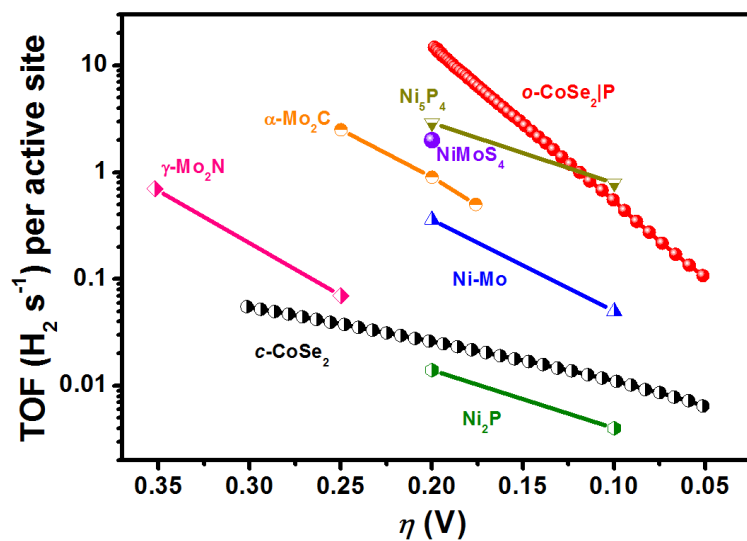

**Supplementary Figure 16. Comparison of the TOF of  $o\text{-CoSe}_2|\text{P}$  with other catalysts.** TOF plots of the  $o\text{-CoSe}_2|\text{P}$  catalyst together with other documented alkaline HER catalysts (**Supplementary Tables 1-2**). We determined the active site to be  $\sim 4.81 \times 10^{16}$  sites per  $\text{cm}^2$ , based on the hypothesis that one  $\text{Co-X}_2$  dumbbell offers one active site (details of the calculation are provided in **Supplementary Note 1**). In particular,  $o\text{-CoSe}_2|\text{P}$  catalyst gives TOF values of 0.65 and  $14.95 \text{ H}_2 \text{ s}^{-1}$  at overpotentials of 104 ( $j = 10 \text{ mA cm}^{-2}$ ) and 200 mV ( $j = 230 \text{ mA cm}^{-2}$ ), respectively. It shows clearly that  $o\text{-CoSe}_2|\text{P}$  catalyst outperforms recently developed non-noble HER catalysts in alkali.

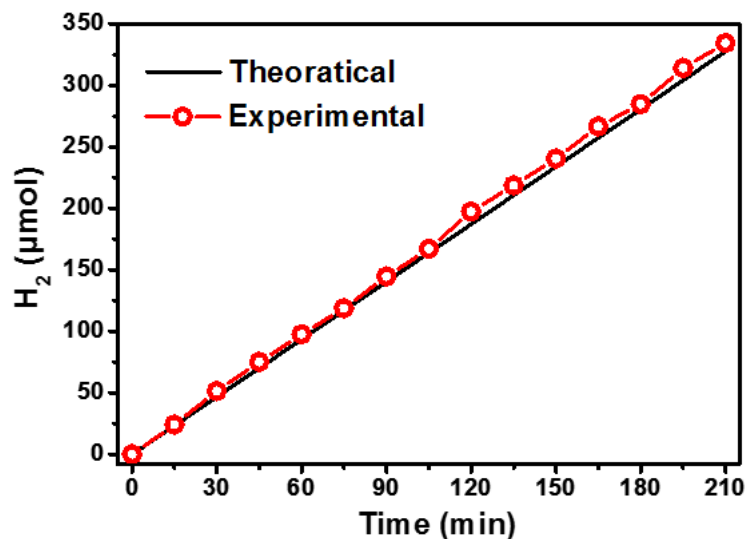

**Supplementary Figure 17. Hydrogen production efficiency.** Gas chromatography (GC)-measured H<sub>2</sub> quantity compared with theoretically calculated H<sub>2</sub> quantity assuming a 100% Faradic efficiency for the hydrogen evolution catalyzed by the *o*-CoSe<sub>2</sub>|P catalyst in 1 M KOH at a current density of 10 mA cm<sup>-2</sup>. We measured the H<sub>2</sub> production in a custom made two compartment cell, which is separated by a Nafion membrane. Each compartment of the cell was filled with 25 mL 1.0 M KOH solution. The headspace of the cathodic compartment was approximately 20 mL.

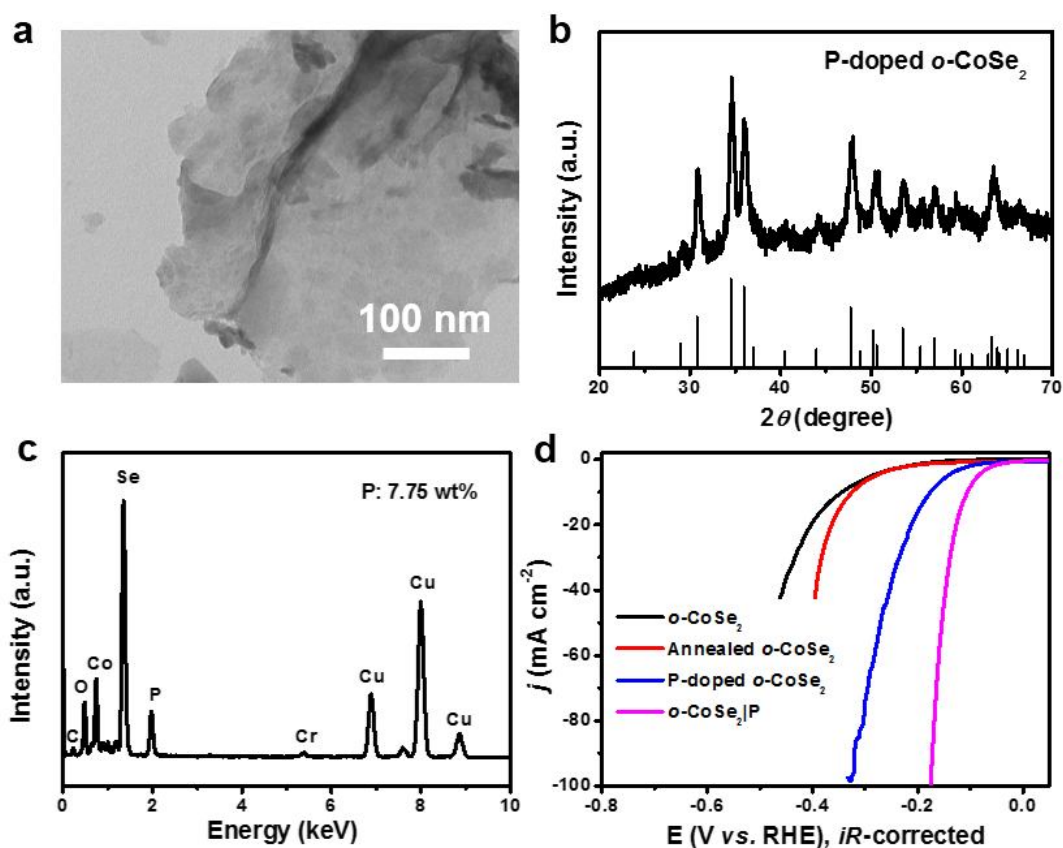

**Supplementary Figure 18. Structural characterizations and HER performance of P-doped *o*-CoSe<sub>2</sub>.** **a**, TEM image, **b**, XRD pattern and **c**, EDX spectrum of the P-doped *o*-CoSe<sub>2</sub> that prepared by phosphorization of fresh *o*-CoSe<sub>2</sub> via the same method. **d**, HER polarization curves of pure *o*-CoSe<sub>2</sub>, Ar-annealed *o*-CoSe<sub>2</sub>, P-doped *o*-CoSe<sub>2</sub>, and *o*-CoSe<sub>2</sub>|P in 1 M KOH. Catalyst loading:  $\sim 1.0 \text{ mg cm}^{-2}$ . Sweep rate:  $10 \text{ mV s}^{-1}$ . These results reveal that, although P-doped *o*-CoSe<sub>2</sub> shows good activity promotions as compared with pure *o*-CoSe<sub>2</sub>, it is still inferior to the performance of the new *o*-CoSe<sub>2</sub>|P catalyst. We attribute this observation to the doping-induced bonds rotation and structure reconstructions, which create additional surface sites that are HER active, further highlighting the effectiveness of this doping-inducing phase-transition method for accessing newly advanced electrocatalysts.

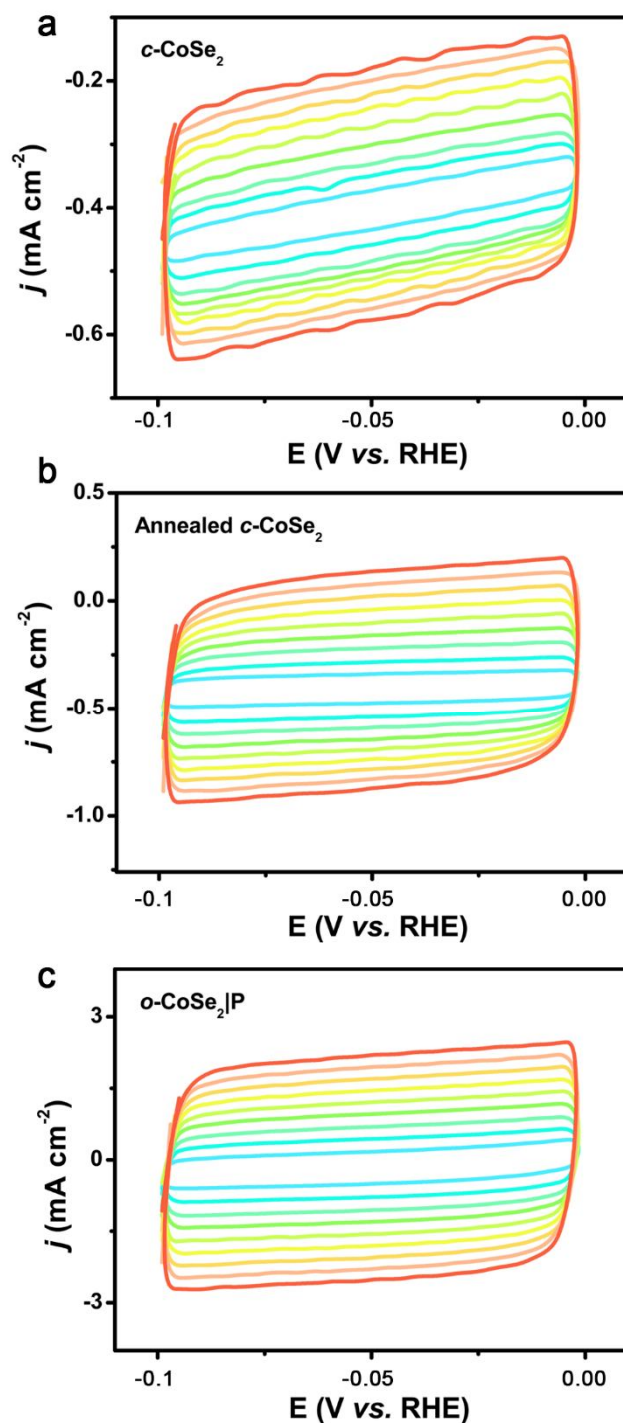

**Supplementary Figure 19. Capacitance measurement.** a-c, CV in the region of -0.1~0.0 V vs. RHE for various studied catalysts. The double layer capacitance ( $C_{dl}$ ) is an alternative approach to estimate the effective surface area, thus offering a relative comparison. CV responses in the region of -0.1~0.0 vs. RHE could be resulted from the charging of double layer and the  $C_{dl}$  value can be estimated by plotting the  $\Delta j$  ( $j_a - j_c$ ) at -0.05 V vs. RHE against the scan rate, where the slop is double  $C_{dl}$  (Fig. 3e in main text).

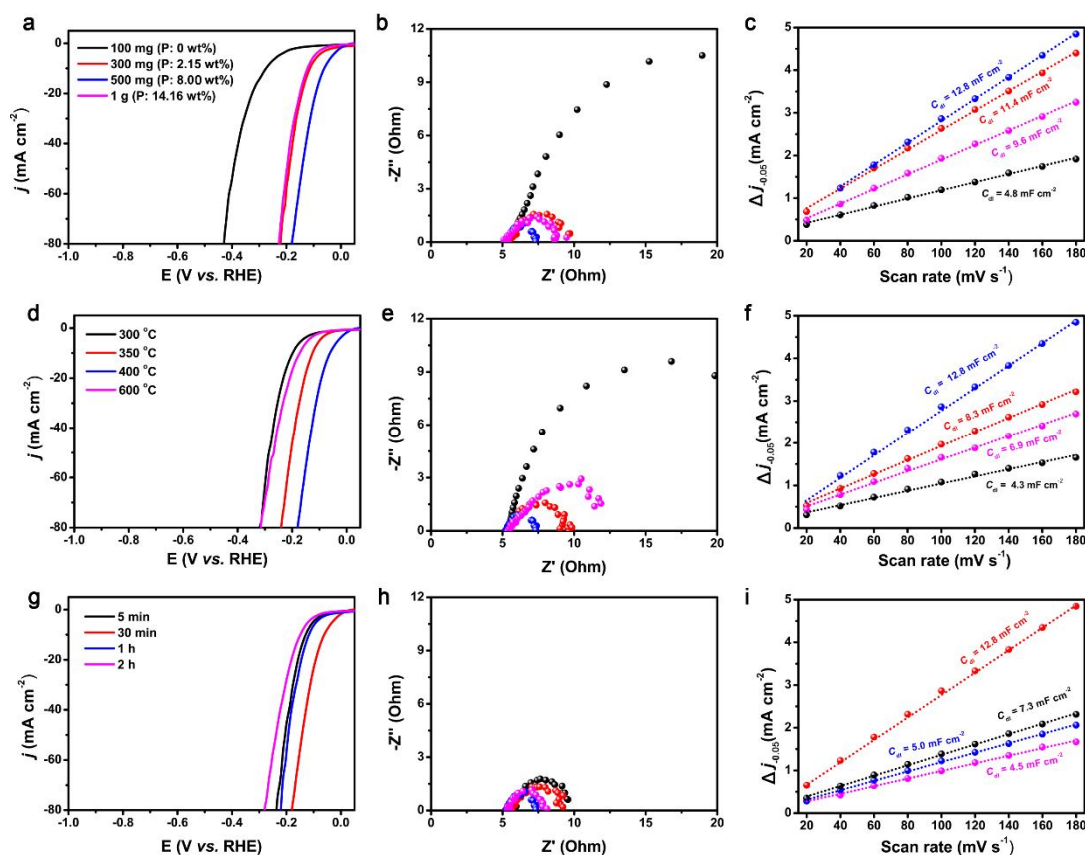

**Supplementary Figure 20. Influence of synthetic parameters on the HER properties in 1 M KOH.** **a, d, g,** HER polarization curves, and **b, e, h,** corresponding EIS Nyquist plots of *o*-CoSe<sub>2</sub>|P catalysts prepared at different synthetic parameters. **c, f, i,** Plots showing the extraction of the  $C_{dl}$  for *o*-CoSe<sub>2</sub>|P catalysts prepared at different synthetic parameters. It reveals that the optimized *o*-CoSe<sub>2</sub>|P catalyst obtained at 400 °C for 30 min with P-doping amount of 8 wt%.

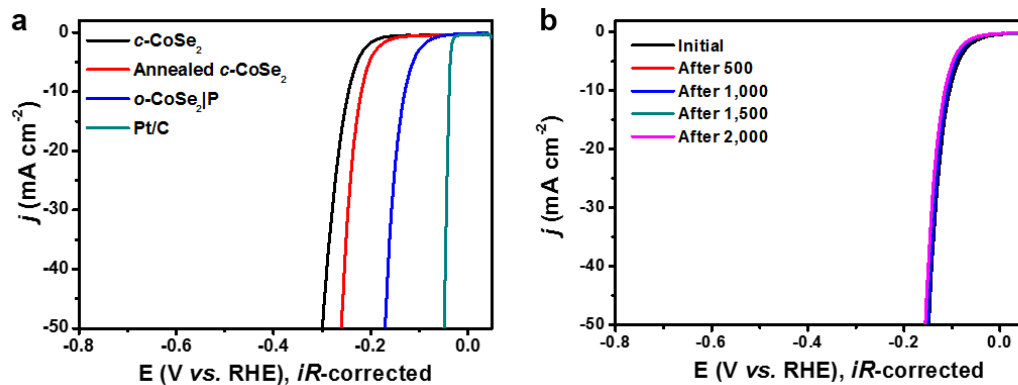

**Supplementary Figure 21. HER properties in 0.5 M H<sub>2</sub>SO<sub>4</sub>.** **a**, Polarization curves of  $o$ -CoSe<sub>2</sub>|P,  $c$ -CoSe<sub>2</sub>, annealed CoSe<sub>2</sub> and commercial Pt/C catalysts in 0.5 M H<sub>2</sub>SO<sub>4</sub> (pH = 0). Catalysts loading:  $\sim 1.0$  mg cm<sup>-2</sup>. Sweep rate: 10 mV s<sup>-1</sup>. **b**, Polarization curves recorded from  $o$ -CoSe<sub>2</sub>|P catalyst before and after 2,000 CV cycles.



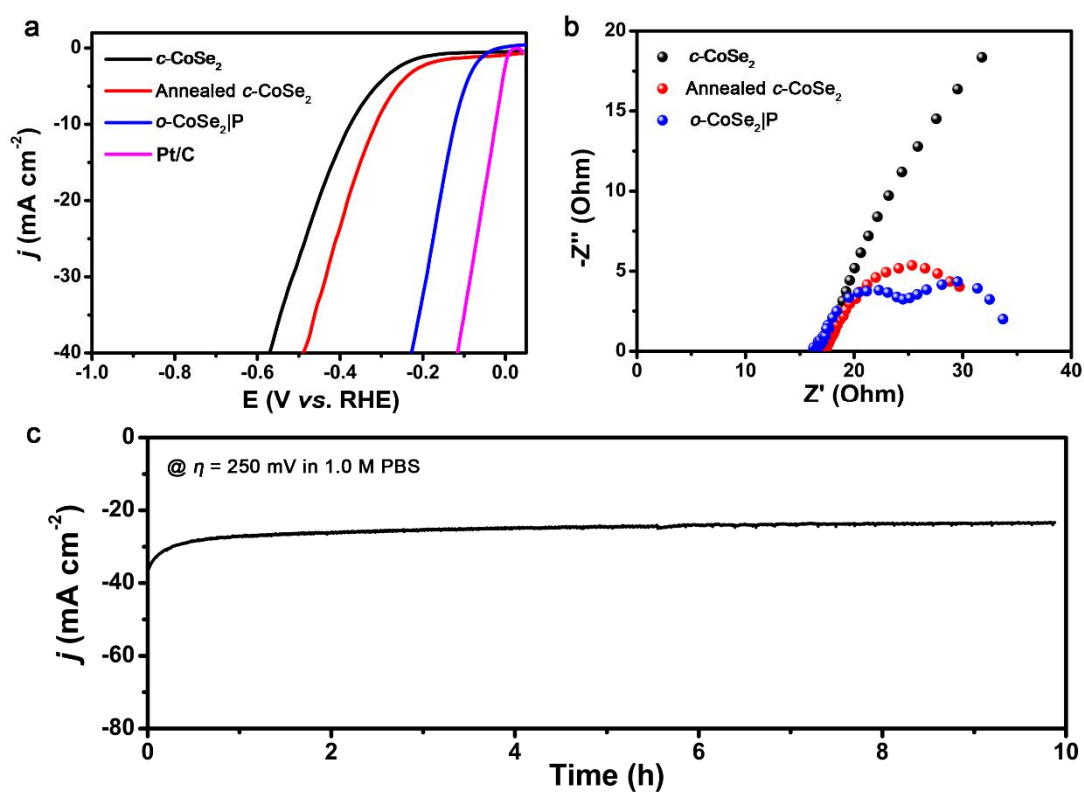

**Supplementary Figure 22. HER properties in PBS solution (pH 7.02).** **a**, HER polarization curves of  $o$ -CoSe<sub>2</sub>|P,  $c$ -CoSe<sub>2</sub>, annealed  $c$ -CoSe<sub>2</sub> and commercial Pt/C catalysts. Catalyst loading:  $\sim 1.0$  mg cm<sup>-2</sup>. Sweep rate: 10 mV s<sup>-1</sup>. **b**, EIS Nyquist plots of  $o$ -CoSe<sub>2</sub>|P,  $c$ -CoSe<sub>2</sub>, and annealed  $c$ -CoSe<sub>2</sub>. **c**, Chronoamperometric responses ( $j \sim t$ ) recorded on  $o$ -CoSe<sub>2</sub>|P at a constant overpotential of 250 mV in 1 M PBS.

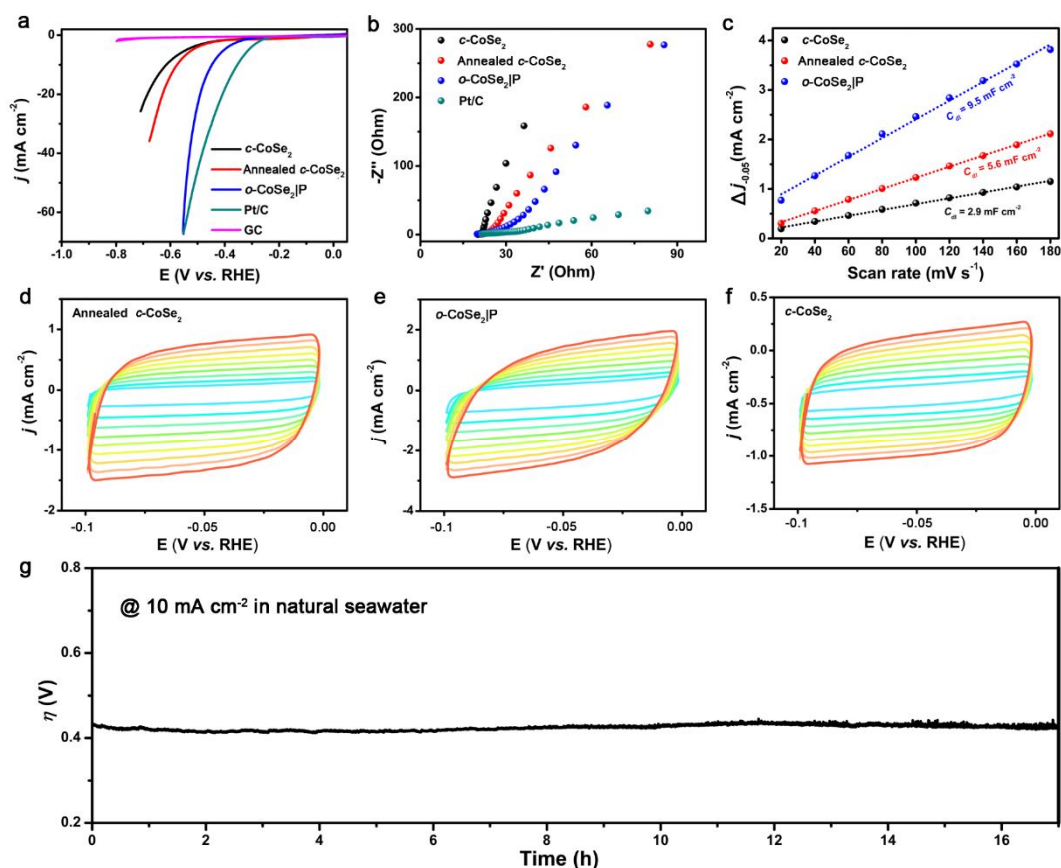

**Supplementary Figure 23. HER properties in seawater (Gulf Stream in the Gulf of Mexico. pH 7.84).** **a**, HER polarization curves of  $o$ -CoSe<sub>2</sub>|P,  $c$ -CoSe<sub>2</sub>, annealed CoSe<sub>2</sub> and commercial Pt/C catalysts. Catalysts loading:  $\sim 1.0$  mg cm<sup>-2</sup>. Sweep rate: 10 mV s<sup>-1</sup>. **b**, EIS Nyquist plots of  $o$ -CoSe<sub>2</sub>|P,  $c$ -CoSe<sub>2</sub>, and annealed  $c$ -CoSe<sub>2</sub>. **c**, Plot showing the extraction of the  $C_{dl}$  for the different studied catalysts. **d-f**, CV in the region of -0.1 ~ 0.0 V vs. RHE for different studied catalysts. **g**, Chronoamperometric responses ( $\eta \sim t$ ) recorded on  $o$ -CoSe<sub>2</sub>|P at a constant current density of 10 mA cm<sup>-2</sup> in seawater.

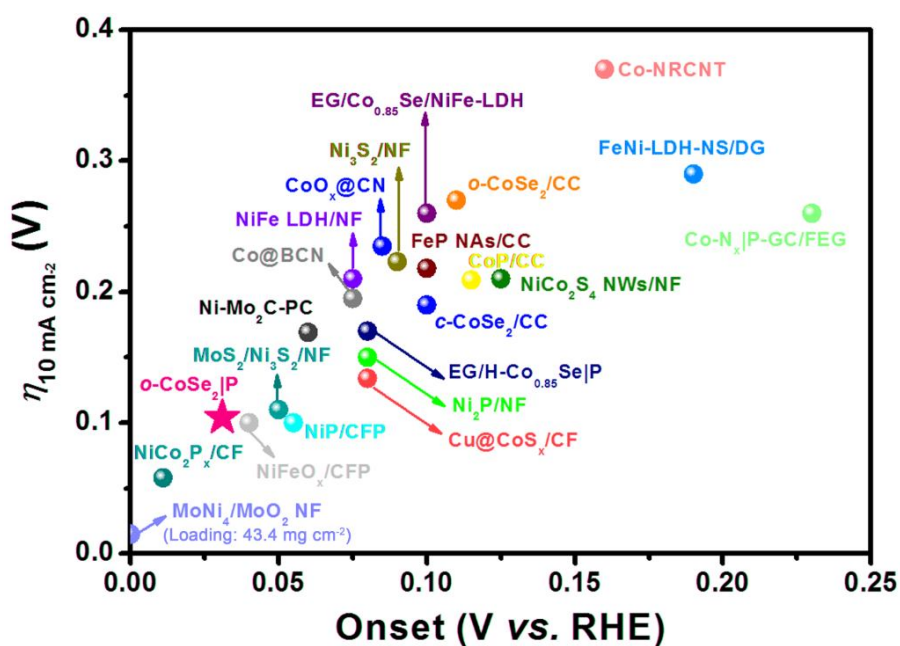

**Supplementary Figure 24. Comparison of the HER property of *o*-CoSe<sub>2</sub>|P with other reported composite catalysts in alkaline solutions.**  $\eta_{\text{onset}}$  versus  $\eta_{10 \text{ mA/cm}^2}$  electrocatalytic property map for *o*-CoSe<sub>2</sub>|P with various reported composite HER electrocatalysts in alkali (also see **Supplementary Table 2**). We note that some catalysts take very high catalyst loadings for comparison. For example, MoNi<sub>4</sub>/MoO<sub>2</sub> NF catalyst with a very high loading of 43.4 mg cm<sup>-2</sup>.

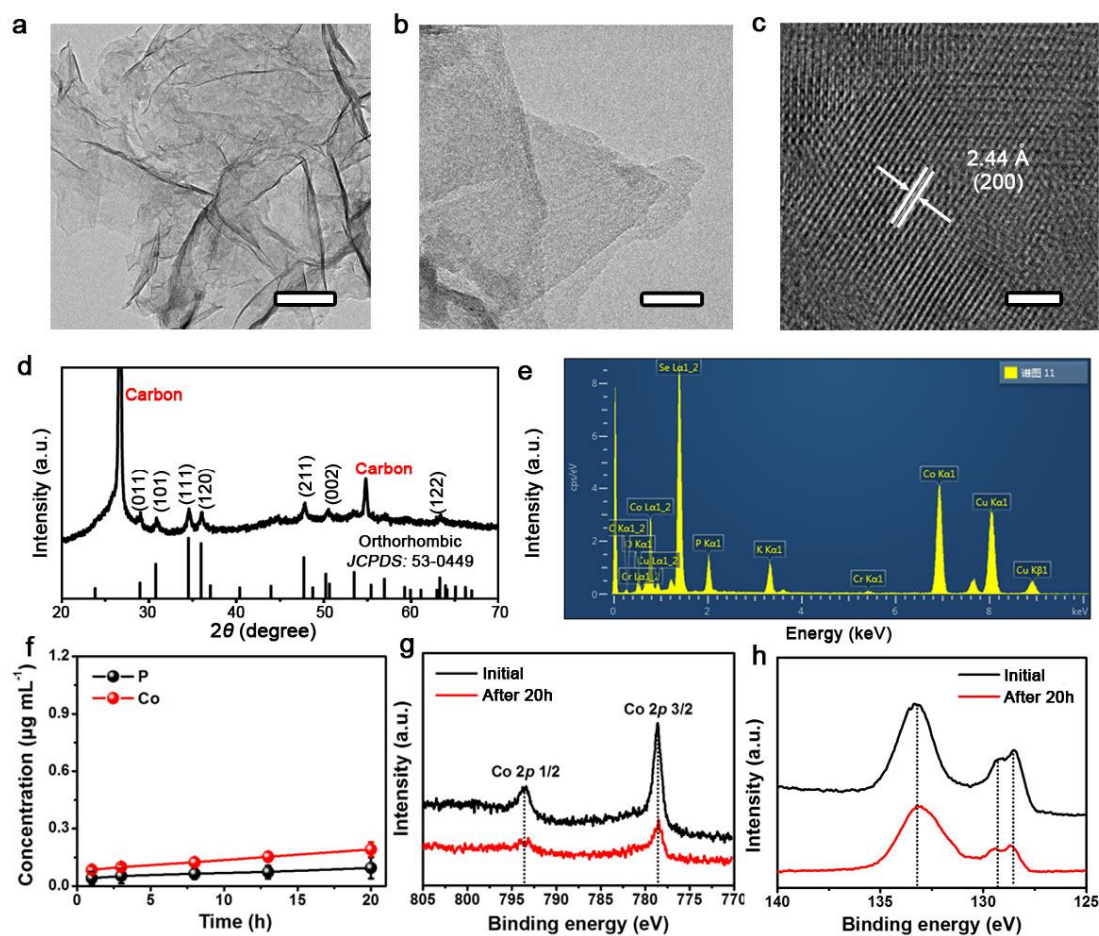

**Supplementary Figure 25. Stability study of *o*-CoSe<sub>2</sub>|P catalyst.** **a, b**, TEM images with different magnification (Scale bar, 100 and 20 nm, respectively) and **c**, HRTEM image (scale bar, 2 nm) of *o*-CoSe<sub>2</sub>|P after a 20 h chronoamperometry measurement at a constant 250 mV overpotential. **d**, XRD pattern of *o*-CoSe<sub>2</sub>|P-modified carbon fiber paper electrode after the stability test. **e**, EDX spectrum of *o*-CoSe<sub>2</sub>|P after the stability test. **f**, ICP results show the concentration of P and Co in the electrolyte at different time intervals during the HER stability test. Only trace amount of Co and P were detected, which might be attributed to the catalyst fell off from the carbon paper substrate. The error bars represent the s.d. of three replicate measurements. **g**, Co 2*p*, and **h**, P 2*p* XPS spectra of the *o*-CoSe<sub>2</sub>|P catalyst before and after stability test. These results demonstrate the remarkable catalytic robustness of *o*-CoSe<sub>2</sub>|P catalyst in alkaline electrolyte.

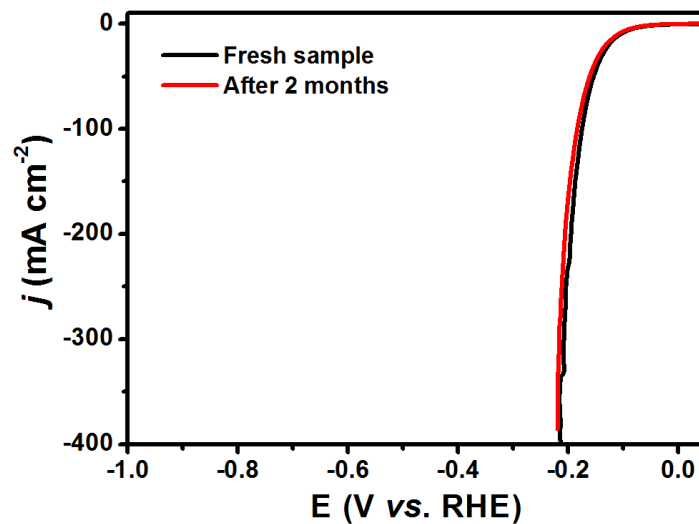

**Supplementary Figure 26. Storage stability.** Polarization curves (with  $iR$ -corrected) recorded from  $o$ -CoSe<sub>2</sub>|P before and after 2 months of storage under lab environment (stored in an airtight sample tube), revealing that no obvious degradation of HER activity was detected and thereby demonstrating the good storage stability.

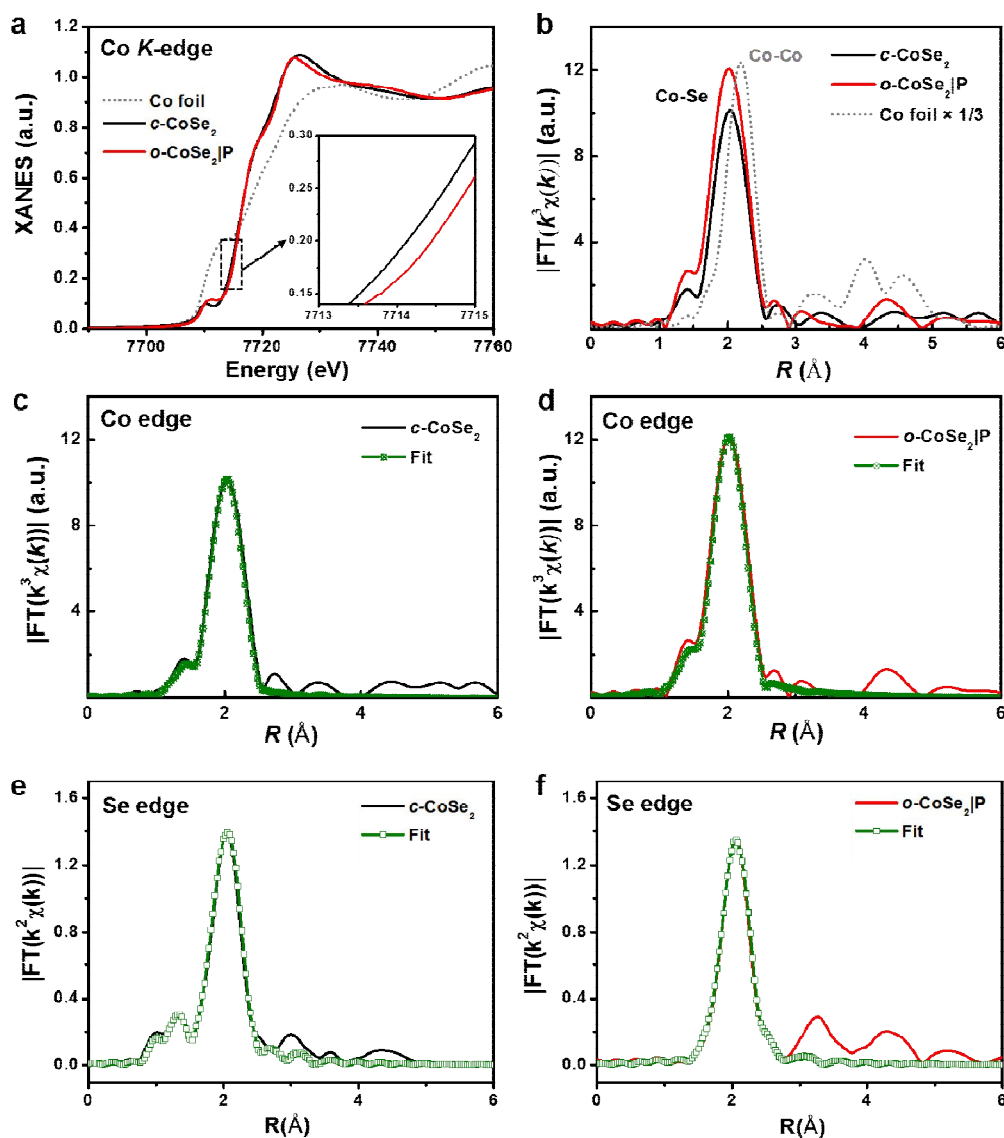

**Supplementary Figure 27. XAFS spectra of  $c$ -CoSe<sub>2</sub> and  $o$ -CoSe<sub>2</sub>|P.** **a**, Co  $K$ -edge XANES spectra. The Inset shows the enlarged spectra at the Co  $K$ -edge. The edge position of  $o$ -CoSe<sub>2</sub>|P shifted to higher energy indicates that the electron-deficient on Co sites. **b**, EXAFS Fourier transformed  $k^3$ -weighted  $\chi(k)$  function spectra of  $c$ -CoSe<sub>2</sub>,  $o$ -CoSe<sub>2</sub>|P and Co foil. **c**, **d**, The EXAFS fitting results of the Co edge for  $c$ -CoSe<sub>2</sub> and  $o$ -CoSe<sub>2</sub>|P, respectively. The peak at 2.04 Å of  $c$ -CoSe<sub>2</sub>, corresponding to Co-Se scattering paths. In contrast, for the  $o$ -CoSe<sub>2</sub>|P, the peak intensity is increased and shifts to lower  $R$  by 0.02 Å. The increased peak intensity can be attributed to the modified surface structural disorder of  $o$ -CoSe<sub>2</sub>|P after thermal treatment. The low- $R$  shift of Co-Se peak is due to the partial replacement of Se atoms by smaller P. **e**, **f**, The EXAFS fitting results of the Se edge for  $c$ -CoSe<sub>2</sub> and  $o$ -CoSe<sub>2</sub>|P, respectively. Quantitative structural fitting parameters were given in **Supplementary Table 3**.

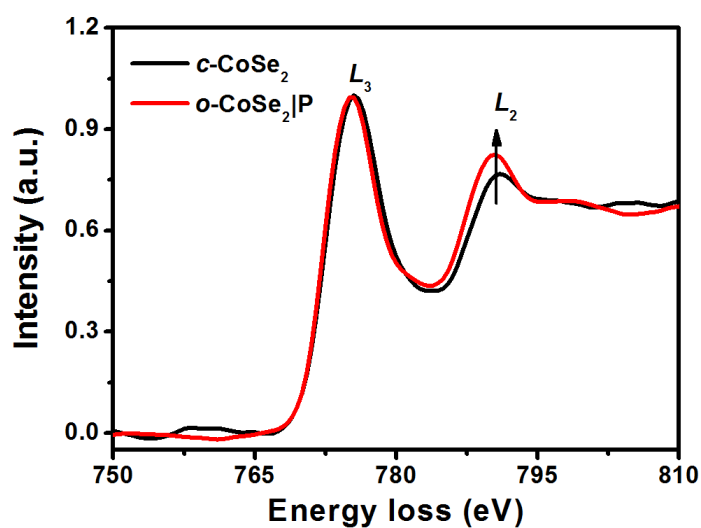

**Supplementary Figure 28. Co  $L$ -edge EELS spectra of  $c$ -CoSe<sub>2</sub> and  $o$ -CoSe<sub>2</sub>|P.** Background-subtracted EELS spectra of the Co  $L_{2,3}$  edges obtained for the  $c$ -CoSe<sub>2</sub> and  $o$ -CoSe<sub>2</sub>|P, which could reveal the excitation of the Co  $2p_{1/2}$  or Co  $2p_{3/2}$  electrons from inner shell into the first available unoccupied states above the Fermi-level. And the  $L_2/L_3$  ratio would be increased when the  $d$ -band occupancy decreases, which means the increased oxidation state of the atoms<sup>4</sup>. Clearly, the  $o$ -CoSe<sub>2</sub>|P has a increased intensity of  $L_2$  edge, suggesting the formal oxidation of Co due to the electron transfer from Co to P.



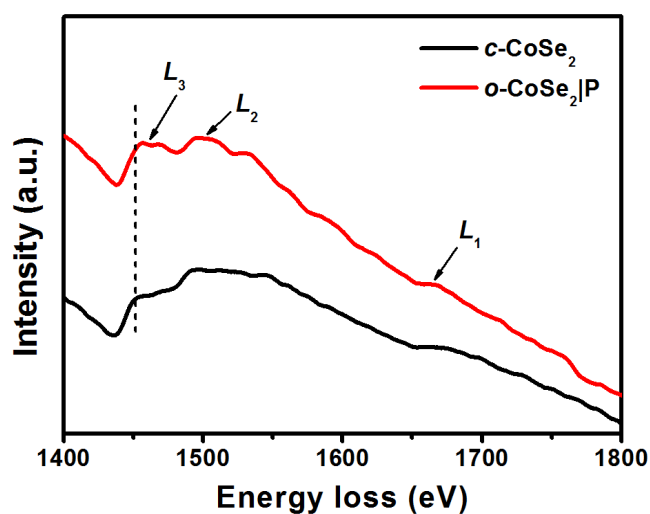

**Supplementary Figure 29. Se *L*-edge EELS spectra of CoSe<sub>2</sub> and *o*-CoSe<sub>2</sub>|P.** The large background below the Se *L*-edge arises from the inelastic scattering events at lower energies, such as generation of secondary electrons, Plasmon losses and ionization of the Se M shell<sup>5</sup>. EELS shift to higher energy indicates that the *o*-CoSe<sub>2</sub>|P with higher oxidation states because of the electron transfer from Se to P.

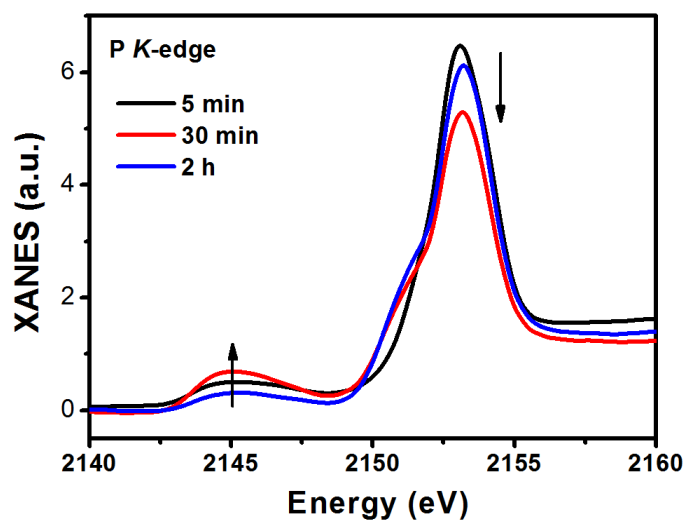

**Supplementary Figure 30. P *K*-edge XANES of *o*-CoSe<sub>2</sub>|P prepared at different annealing times.** The samples exhibit two major features that were centered at 2145.0 and 2153.1 eV. The feature at 2145.0 eV is attributed to P in a phosphide form, consistent with the presence of Co-P (ref. 6). It suggests that the optimized *o*-CoSe<sub>2</sub>|P sample has more Co-P bonds than others. The intense white line centred at 2153.1 eV is assigned to a transition of the P 1s electron into an unoccupied valence electronic state<sup>7</sup>. The depressed intensity and the shifted pre-edge of optimized *o*-CoSe<sub>2</sub>|P are attributed to the electrons transfer form neighboring Co or Se atoms to P.

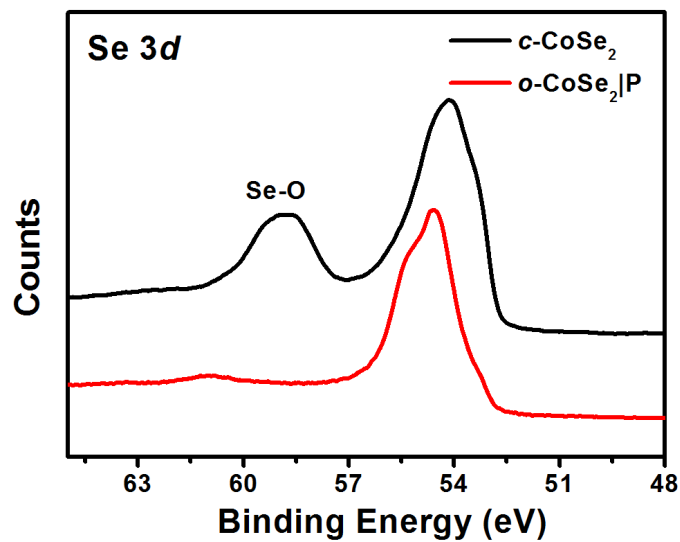

**Supplementary Figure 31. High-resolution XPS spectra.** High-resolution Se 3d XPS spectra for  $c\text{-CoSe}_2$  and  $o\text{-CoSe}_2|\text{P}$ . The disappeared oxidation state feature of the Se species for  $o\text{-CoSe}_2|\text{P}$  catalyst indicates that the participation of P can mitigate the surface oxidation process.

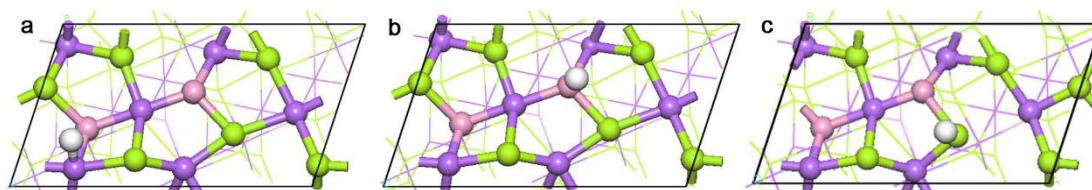

**Supplementary Figure 32. H adsorption on different atom sites.** a-c, The adsorption sites of H atom on top of Co, P and Se atoms on the (111) facet of *o*-CoSe<sub>2</sub>|P. The *o*-CoSe<sub>2</sub>|P surface was built by replacing Se atoms with P in the *o*-CoSe<sub>2</sub> (111) and the ratio of P atoms is ~8%. Different P distributed structures have been tested, and the most stable surface was used to calculate the hydrogen adsorption. Based on the calculation, replacing Se by P atoms is able to switch the pristine Co-Se and Se-Se bonds to shorter Co-P and Se-P bonds. The altered structures are able to modulate the surface states and charge distribution, thus optimizing the Gibbs free-energy ( $\Delta G_{H^*}$ ). The corresponding  $\Delta G_{H^*}$  are shown in Table S4.

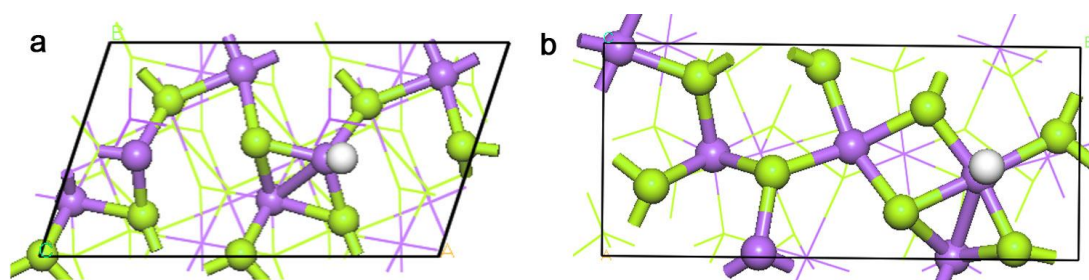

**Supplementary Figure 33. H adsorption on selected facets of studied catalysts. a, b,** The adsorption site of H atom on the *o*-CoSe<sub>2</sub> (111) and *c*-CoSe<sub>2</sub> (210) facets, respectively. The calculated lattice parameters of orthorhombic and cubic CoSe<sub>2</sub> are  $a=3.636 \text{ \AA}$ ,  $b=4.894 \text{ \AA}$ ,  $c=5.875 \text{ \AA}$  and  $a=b=c=5.860 \text{ \AA}$ , respectively, in accordance with previous experimental and theoretical studies<sup>8,9</sup>. (2×1) orthorhombic CoSe<sub>2</sub> (111) and cubic CoSe<sub>2</sub> (210) surfaces are adopted in the calculations, both with Co-terminated surfaces. 9 and 11 layers (here the distance between the neighboring layer is larger than 0.9 Å) in the orthorhombic CoSe<sub>2</sub> (111) and cubic CoSe<sub>2</sub> (210) surfaces, respectively, both with the bottom three layers fixed.

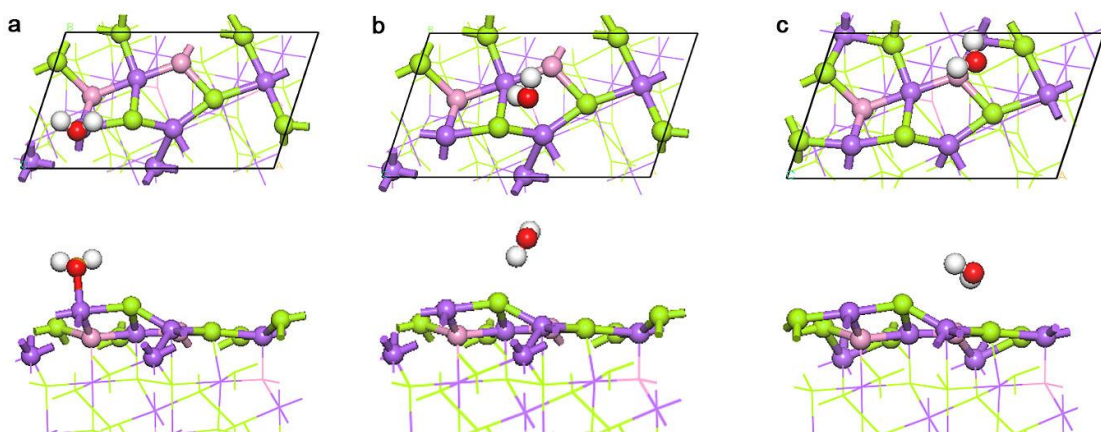

**Supplementary Figure 34. H<sub>2</sub>O adsorption.** a-c, The adsorption site of H<sub>2</sub>O molecule on the top of Co, P and Se atoms in the optimized (111) facet of *o*-CoSe<sub>2</sub>|P, respectively.

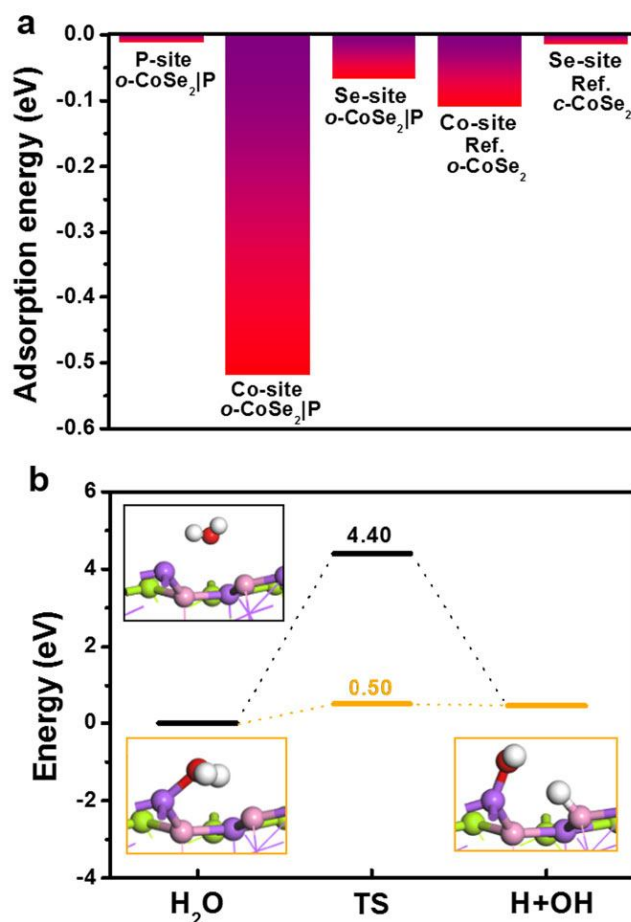

**Supplementary Figure 35. Adsorption and dissociation of H<sub>2</sub>O molecule on *o*-CoSe<sub>2</sub>|P surface.** **a**, Adsorption energy of H<sub>2</sub>O molecule. Comparison of the adsorption energy of H<sub>2</sub>O on different atoms on the (111) facet of *o*-CoSe<sub>2</sub>|P. The data of *c*-CoSe<sub>2</sub> and *o*-CoSe<sub>2</sub> are derived from ref. 10. It shows that H<sub>2</sub>O molecule on the Co atom sites of *o*-CoSe<sub>2</sub>|P exhibits the lowest water adsorption energy of -0.52 eV as compared to that of P sites (-0.068 eV) and Se sites (-0.0127 eV), which suggests that the initial H<sub>2</sub>O molecules can readily adsorbed on the Co sites of *o*-CoSe<sub>2</sub>|P. **b**, H<sub>2</sub>O dissociation in vacuum and on *o*-CoSe<sub>2</sub>|P surface. Because the weak adsorption energy of H<sub>2</sub>O molecular on Se and P sites, there is almost no H<sub>2</sub>O molecular on these sites, thus the dissociated energy of H<sub>2</sub>O on these sites are similar in vacuum. As to Co sites, the energy barrier of H<sub>2</sub>O dissociation could be largely reduced from 4.40 eV (in vacuum) to 0.50 eV, suggesting that Co sites not only bear a strong water affinity, but also easily activate H<sub>2</sub>O to generate intermediate H and OH species. Hence, these results evidence the synergistic interplay between Co (water adsorption and dissociation) and P (water reduction) that gives rise to the remarkable HER energetics.

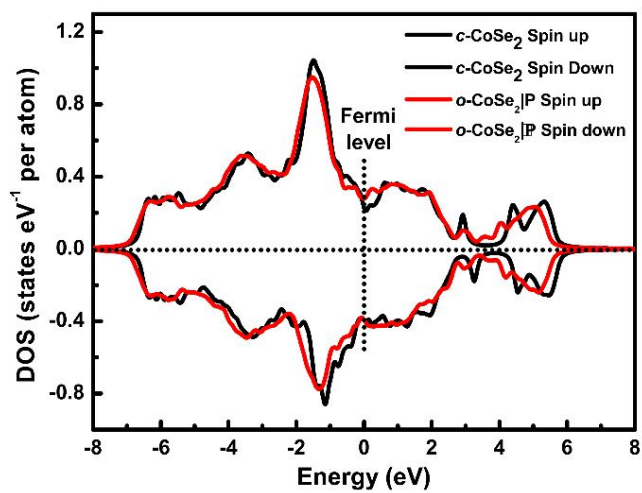

**Supplementary Figure 36. DOS diagram.** Comparison of the total DOS diagram for *c*-CoSe<sub>2</sub> and *o*-CoSe<sub>2</sub>|P catalysts.



**Supplementary Table 1: Comparison of catalytic parameters of *o*-CoSe<sub>2</sub>|P and other non-noble-metal HER single-catalysts in alkaline media.**

| Catalyst                                               | Loading<br>(mg cm <sup>-2</sup> ) | Electrolyte | Onset potential<br>@ 1 mA cm <sup>-2</sup><br>(mV vs. RHE) | $\eta_{10 \text{ mA cm}^{-2}}$<br>(mV) | Tafel slope<br>(mV dec <sup>-1</sup> ) | $j_0$<br>(mA cm <sup>-2</sup> ) | TOF<br>(H <sub>2</sub> s <sup>-1</sup> per site) | Ref.      |
|--------------------------------------------------------|-----------------------------------|-------------|------------------------------------------------------------|----------------------------------------|----------------------------------------|---------------------------------|--------------------------------------------------|-----------|
| CoMoS                                                  | 0.84                              | 1 M KOH     | 42                                                         | 98                                     | 82                                     | 0.74                            | N/A                                              | 11        |
| Co(S <sub>0.71</sub> Se <sub>0.29</sub> ) <sub>2</sub> | ~1                                | 1 M KOH     | ca. 70                                                     | 145                                    | 85.7                                   | N/A                             | N/A                                              | 12        |
| O-Co <sub>2</sub> P                                    | 0.2                               | 1 M KOH     | 110                                                        | 160                                    | 61.1                                   | N/A                             | N/A                                              | 13        |
| N,S-graphitic sheets                                   | 0.643                             | 0.1 M KOH   | 230                                                        | 310                                    | 112                                    | N/A                             | N/A                                              | 14        |
| Pr <sub>0.5</sub> BSCF                                 | 0.232                             | 1 M KOH     | 179                                                        | 237                                    | 45                                     | N/A                             | N/A                                              | 15        |
| NiCo <sub>2</sub> O <sub>4</sub>                       | ~1                                | 1 M NaOH    | 50                                                         | 110                                    | 49.7                                   | N/A                             | N/A                                              | 16        |
| NiMo <sub>2</sub> S <sub>4</sub>                       | 0.3                               | 0.1 M KOH   | 59                                                         | 257                                    | 98                                     | 0.039                           | N/A                                              | 17        |
| VOOH                                                   | 0.8                               | 1 M KOH     | 100                                                        | 164                                    | 104                                    | N/A                             | N/A                                              | 18        |
| MoB                                                    | 0.9                               | 1 M KOH     | 140                                                        | 220                                    | 59                                     | 2.0 x 10 <sup>-3</sup>          | N/A                                              | 19        |
| Mo <sub>2</sub> C                                      | 1.1                               | 1 M KOH     | 140                                                        | 170                                    | 54                                     | 3.8 x 10 <sup>-3</sup>          | N/A                                              | 19        |
| Ni <sub>2</sub> P                                      | 0.14                              | 1 M KOH     | 120                                                        | 220                                    | N/A                                    | N/A                             | N/A                                              | 20        |
| MoC <sub>x</sub>                                       | 0.8                               | 1 M KOH     | 80                                                         | 151                                    | 59                                     | 0.029                           | N/A                                              | 21        |
| Ni-Co-P                                                | 0.286                             | 1 M KOH     | 133                                                        | 150                                    | 60.6                                   | N/A                             | N/A                                              | 22        |
| Ni <sub>0.75</sub> Ag <sub>0.25</sub>                  | N/A                               | 0.1 M KOH   | 110                                                        | 300                                    | N/A                                    | N/A                             | N/A                                              | 23        |
| MoP                                                    | 0.86                              | 1 M KOH     | 75                                                         | 128                                    | 48                                     | 4.6 x 10 <sup>-2</sup>          | N/A                                              | 24        |
| NiSe <sub>2</sub> NCs                                  | ~1                                | 1 M KOH     | 310                                                        | 544                                    | 139                                    | 5.0 x 10 <sup>-3</sup>          | N/A                                              | 25        |
| <i>c</i> -CoSe <sub>2</sub> NCs                        | ~1                                | 1 M KOH     | 300                                                        | 520                                    | 126                                    | 8.6 x 10 <sup>-3</sup>          | N/A                                              | 25        |
| $\alpha$ -Mo <sub>2</sub> C                            | 0.102                             | 1 M KOH     | 100                                                        | 176                                    | 58                                     | N/A                             | 0.9 <sub>200 mV</sub>                            | 26        |
| $\gamma$ -Mo <sub>2</sub> N                            | 0.102                             | 1 M KOH     | 240                                                        | 353                                    | 158                                    | N/A                             | 0.7 <sub>200 mV</sub>                            | 26        |
| Ni <sub>0.90</sub> Fe <sub>0.10</sub> PS <sub>3</sub>  | 0.51                              | 1 M KOH     | N/A                                                        | 72                                     | 73                                     | N/A                             | N/A                                              | 27        |
| <i>o</i> -CoSe <sub>2</sub>  P                         | 1.02                              | 1 M KOH     | 31                                                         | 104                                    | 69                                     | 0.43                            | 14.95 <sub>200mV</sub>                           | This work |

Pr<sub>0.5</sub>BSCF = Pr<sub>0.5</sub>(Ba<sub>0.5</sub>Sr<sub>0.5</sub>)<sub>0.5</sub>Co<sub>0.8</sub>Fe<sub>0.2</sub>O<sub>3- $\delta$</sub> ; NCs = Nanocrystals; NBs = Nanobelts

**Supplementary Table 2: Comparison of catalytic parameters of *o*-CoSe<sub>2</sub>|P and other non-noble-metal HER composite-catalysts in alkaline media.**

| Catalyst                                                      | Loading<br>(mg cm <sup>-2</sup> ) | Electrolyte | Onset potential<br>@ 1 mA cm <sup>-2</sup><br>(mV vs. RHE) | $\eta_{10 \text{ mA cm}^{-2}}$<br>(mV) | Tafel slope<br>(mV dec <sup>-1</sup> ) | $j_0$<br>(mA cm <sup>-2</sup> ) | TOF<br>(H <sub>2</sub> s <sup>-1</sup> per site) | Ref.      |
|---------------------------------------------------------------|-----------------------------------|-------------|------------------------------------------------------------|----------------------------------------|----------------------------------------|---------------------------------|--------------------------------------------------|-----------|
| CoP/CC                                                        | 0.92                              | 1 M KOH     | 115                                                        | 209                                    | 129                                    | N/A                             | N/A                                              | 28        |
| NiP/CFP                                                       | 25.8                              | 1 M KOH     | 55                                                         | 100                                    | 85.4                                   | N/A                             | N/A                                              | 29        |
| Ni <sub>2</sub> P/NF                                          | N/A                               | 1 M KOH     | 80                                                         | 150                                    | 86                                     | N/A                             | N/A                                              | 30        |
| <i>o</i> -CoSe <sub>2</sub> /CC                               | N/A                               | 1 M KOH     | 100                                                        | 190                                    | 85                                     | N/A                             | N/A                                              | 31        |
| <i>o</i> -CoSe <sub>2</sub> /CC                               | N/A                               | 1 M KOH     | 110                                                        | 270                                    | 120                                    | N/A                             | N/A                                              | 31        |
| FeP NAs/CC                                                    | 1.5                               | 1 M KOH     | 100                                                        | 218                                    | 146                                    | N/A                             | N/A                                              | 32        |
| CoP-MNA/CFP                                                   | N/A                               | 1 M KOH     | N/A                                                        | 54                                     | 51                                     | 0.857                           | N/A                                              | 33        |
| NiCo <sub>2</sub> P/CF                                        | N/A                               | 1 M KOH     | 11                                                         | 58                                     | 34.3                                   | N/A                             | 0.056 <sub>100mV</sub>                           | 34        |
| EG/H-Co <sub>0.85</sub> Se P                                  | 2.1                               | 1 M KOH     | ca. 80                                                     | 170                                    | 86                                     | N/A                             | N/A                                              | 35        |
| EG/Co <sub>0.85</sub> Se/NiFe-LDH                             | 4.0                               | 1 M KOH     | 100                                                        | 260                                    | 160                                    | 0.22                            | N/A                                              | 36        |
| Ni <sub>0.85</sub> Co <sub>0.15</sub> Se <sub>2</sub> MNSN/NF | 2.62                              | 1 M KOH     | N/A                                                        | 85                                     | 52                                     | N/A                             | N/A                                              | 37        |
| NiMoS <sub>2</sub> /Ti mesh                                   | 1.71                              | 1 M KOH     | N/A                                                        | 138                                    | 97                                     | N/A                             | 0.725 <sub>148 mV</sub>                          | 38        |
| Ni <sub>3</sub> S <sub>2</sub> /NF                            | 1.6                               | 1 M KOH     | 90                                                         | 223                                    | N/A                                    | N/A                             | N/A                                              | 39        |
| NiCo <sub>2</sub> S <sub>4</sub> NWs/NF                       | N/A                               | 1 M KOH     | 125                                                        | 210                                    | 58.9                                   | N/A                             | N/A                                              | 40        |
| MoS <sub>2</sub> /Ni <sub>3</sub> S <sub>2</sub> /NF          | 9.7                               | 1 M KOH     | 50                                                         | 110                                    | 83.1                                   | N/A                             | N/A                                              | 41        |
| Cu@CoS <sub>2</sub> /CF                                       | -3.9                              | 1 M KOH     | ca. 80                                                     | 134                                    | N/A                                    | N/A                             | N/A                                              | 42        |
| Ni <sub>3</sub> P <sub>4</sub> pellet                         | 177                               | 1 M KOH     | N/A                                                        | 49                                     | 98                                     | N/A                             | 2.9 <sub>200 mV</sub>                            | 43        |
| Ni <sub>2</sub> P pellet                                      | 177                               | 1 M KOH     | N/A                                                        | 69                                     | 118                                    | N/A                             | 0.014 <sub>200 mV</sub>                          | 43        |
| NiFe LDH-NS/DG                                                | 2                                 | 1 M KOH     | 190                                                        | 290                                    | 110                                    | N/A                             | N/A                                              | 44        |
| NiFe LDH/NF                                                   | N/A                               | 1 M NaOH    | 75                                                         | 210                                    | 58.9                                   | N/A                             | N/A                                              | 45        |
| CoO <sub>x</sub> @CN                                          | 0.42                              | 1 M KOH     | 85                                                         | 235                                    | 115                                    | N/A                             | N/A                                              | 46        |
| Mn <sub>3</sub> O <sub>4</sub> MTA/NF                         | N/A                               | 1 M KOH     | 100                                                        | 190<br>(20 mA cm <sup>-2</sup> )       | 98                                     | N/A                             | N/A                                              | 47        |
| Ni/NiO-CNT                                                    | 0.28                              | 1 M KOH     | N/A                                                        | 80                                     | 82                                     | N/A                             | N/A                                              | 48        |
| NiFeO <sub>x</sub> /CFP                                       | ~1.6                              | 1 M KOH     | 40                                                         | 100                                    | 84.6                                   | N/A                             | N/A                                              | 49        |
| Co@BCN                                                        | N/A                               | 1 M KOH     | 75                                                         | 195                                    | 67.3                                   | 0.013                           | N/A                                              | 50        |
| Co-NRCNT                                                      | 0.28                              | 1 M KOH     | 160                                                        | 370                                    | N/A                                    | N/A                             | N/A                                              | 51        |
| Co-N <sub>2</sub> P-GC/FEG                                    | 0.12                              | 1 M KOH     | 230                                                        | 260                                    | N/A                                    | 0.05                            | N/A                                              | 52        |
| GO-PANi31-FP                                                  | 0.5                               | 0.1 M KOH   | ca. 400                                                    | 520                                    | N/A                                    | N/A                             | N/A                                              | 53        |
| Ni-Mo <sub>2</sub> C-PC                                       | 0.5                               | 1 M KOH     | 60                                                         | 169                                    | 101                                    | 0.2                             | N/A                                              | 54        |
| Ni-Mo nanopowder                                              | 1                                 | 1 M NaOH    | N/A                                                        | ~ 80                                   | N/A                                    | N/A                             | N/A                                              | 55        |
| MoNi <sub>4</sub> /MoO <sub>2</sub> NF                        | 43.4                              | 1 M KOH     | -0                                                         | 15                                     | 30                                     | 1.24                            | N/A                                              | 56        |
| <i>o</i> -CoSe <sub>2</sub>  P                                | 1.02                              | 1 M KOH     | 31                                                         | 104                                    | 69                                     | 0.43                            | 14.95 <sub>200mV</sub>                           | This work |

CC = Carbon cloth; CFP = Carbon fiber paper; NF = Ni foam; NAs = Nanowire arrays; CF = Carbon felt; EG = Exfoliated graphene; LDH = Layered double hydroxide; MNSN = Mesoporous nanosheet networks; NWs = Nanowires; DG = Defective graphene; NS= Nanosheet; CN = N-doped carbon; MTA = Microtube arrays; CNT = Carbon nanotube; BCN = N, B codoped carbon cages; NRCNT = N-riched CNT; GC = Carbon electrode; FEG = Flexible EG; PANi = polyaniline; FP = N, P, F-doped; PC = Porous carbon.

**Supplementary Table 3: EXAFS data fitting results for the studied catalysts.**

| Sample                         | Shell | N         | R <sub>j</sub> (Å) | σ <sup>2</sup> (×10 <sup>-3</sup> Å <sup>2</sup> ) | E <sub>0</sub> (eV) |
|--------------------------------|-------|-----------|--------------------|----------------------------------------------------|---------------------|
| <i>c</i> -CoSe <sub>2</sub>    | Co-Se | 6 ± 0.4   | 2.42 ± 0.2         | 6.0                                                | 2.3                 |
| <i>o</i> -CoSe <sub>2</sub>  P | Co-Se | 5.2 ± 0.4 | 2.42 ± 0.2         | 5.0                                                | 1.2                 |
|                                | Co-P  | 0.8 ± 0.4 | 2.38 ± 0.2         | 5.2                                                | 1.2                 |
| <i>c</i> -CoSe <sub>2</sub>    | Se-Co | 3.1 ± 0.1 | 2.43 ± 0.1         | 5.8                                                | -3                  |
|                                | Se-Se | 1.1 ± 0.1 | 2.44 ± 0.1         | 4.8                                                | -4                  |
| <i>o</i> -CoSe <sub>2</sub>  P | Se-Co | 2.8 ± 0.2 | 2.39 ± 0.2         | 3.5                                                | 6                   |
|                                | Se-Se | 0.9 ± 0.1 | 2.50 ± 0.2         | 4.3                                                | 6.8                 |
|                                | Se-P  | 0.2 ± 0.1 | 2.41 ± 0.1         | 5.7                                                | 5.2                 |

N, coordination number; R, distance between centre and backscatter atoms; σ<sup>2</sup>, the Debye-Waller factor value; ΔE<sup>0</sup> (eV), inner potential correction to account for the difference in inner potential between the sample and the reference compound. S<sub>0</sub> fitting from Co, Se foil defined as 0.68. Because of the low P-doping content in the *o*-CoSe<sub>2</sub>|P structure, the Co-P or Se-P scattering paths could not be well fitted. It is also unlikely to fit the Se-Se scattering path, owing to the similar R values of Co-Se and Se-Se.

**Supplementary Table 4: The  $\Delta E_{\text{ads}}$ ,  $E_{\text{ZPE}}(\text{H}^*)$ ,  $\Delta E_{\text{ZPE}}$  and  $\Delta G(\text{H}^*)$  values of the  $\text{H}^*$  adsorbed on the various catalysts surfaces.**

| <b>Models</b>                  | <b>Adsorption site</b> | <b><math>\Delta E_{\text{ads}}</math><br/>(eV)</b> | <b><math>E_{\text{ZPE}}(\text{H}^*)</math><br/>(eV)</b> | <b><math>\Delta E_{\text{ZPE}}</math><br/>(eV)</b> | <b><math>\Delta G(\text{H}^*)</math><br/>(eV)</b> |
|--------------------------------|------------------------|----------------------------------------------------|---------------------------------------------------------|----------------------------------------------------|---------------------------------------------------|
| <i>o</i> -CoSe <sub>2</sub>  P | P-site                 | -0.36                                              | 0.22                                                    | 0.078                                              | -0.08                                             |
|                                | Se-site                | 0.88                                               | 0.195                                                   | 0.053                                              | 1.14                                              |
|                                | Co-site                | -0.03                                              | 0.176                                                   | 0.034                                              | 0.21                                              |

**Supplementary Note 1: Calculation of the active site density and TOF.** To calculate the active surface site density and per-site TOF for *o*-CoSe<sub>2</sub>|P catalyst, we adopt the method applied by Jin *et al.*<sup>57</sup>. We used CV to measure the  $C_{dl}$  and further calculated the active surface area of *o*-CoSe<sub>2</sub>|P on GC electrode. The polished GC with a  $C_{dl} \approx 0.1 \text{ mF cm}^{-2}$  was used as a control. The roughness factors ( $R_f$ ) of *o*-CoSe<sub>2</sub>|P and *c*-CoSe<sub>2</sub> can be calculated by using the following formular:

$$R_f(o - \text{CoSe}_2|\text{P}) = \frac{12.8 \text{ mF cm}^{-2}}{0.1 \text{ mF cm}^{-2}} = 128 \quad (1)$$

The number of surface catalytic sites on the surface of flat *o*-CoSe<sub>2</sub>|P catalys can be calculated based on the crystal structure of orthorhombic CoSe<sub>2</sub>|P, using its latic parameter ( $a=4.85 \text{ \AA}$ ,  $b=5.827 \text{ \AA}$ ,  $c=3.628 \text{ \AA}$ ) and assuming one active site per Co-X<sub>2</sub> dumbbell (which translates into two active sites per square (111) face of one unit as shown below).

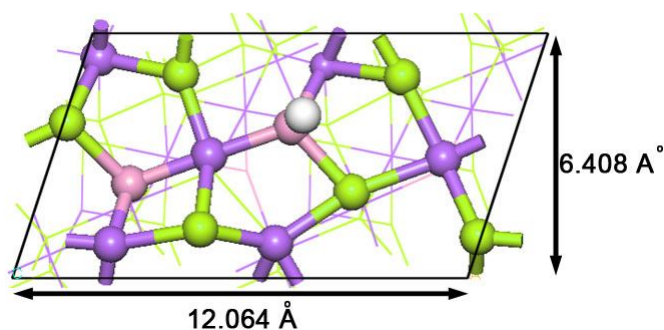

Therefore, the density of surface active sites of *o*-CoSe<sub>2</sub>|P on geometric area is:

$$\frac{2}{12.064 \times 10^{-8} \text{ cm} \times 6.408 \times 10^{-8} \text{ cm}} \times 128 = 4.81 \times 10^{16} \text{ site cm}^{-2} \quad (2)$$

And the TOF per site at an overpotential of 104 mV ( $j = 10 \text{ mA cm}^{-2}$ ) is determined as follows:

$$\frac{0.01 \text{ A}}{1 \text{ cm}^2} \times \frac{1 \text{ C}}{1 \text{ s} \cdot 1 \text{ A}} \times \frac{1 \text{ mol}}{96485 \text{ C}} \times \frac{6.02 \times 10^{23} \text{ e}}{1 \text{ mol}} \times \frac{1}{2 \text{ e}} \times \frac{1 \text{ cm}^2}{4.81 \times 10^{16} \text{ atom}} = 0.65 \frac{\text{H}_2/\text{s}}{\text{surface site}} \quad (3)$$

Therefore, the TOF value of *o*-CoSe<sub>2</sub>|P at  $\eta = 200 \text{ mV}$  ( $j = 230 \text{ mA cm}^{-2}$ ) is determined as follows:

$$\frac{230 \text{ mA cm}^{-2}}{10 \text{ mA cm}^{-2}} \times 0.65 = 14.95 \frac{\text{H}_2/\text{s}}{\text{surface site}} \quad (4)$$

Similarly, the TOF of *c*-CoSe<sub>2</sub> could also be calculated by using the lattice parameter of cubic CoSe<sub>2</sub> (a=b=c=5.860 Å) and assuming active site is Co atom (which translates into three active sites per square 210 face of one unit as shown below):

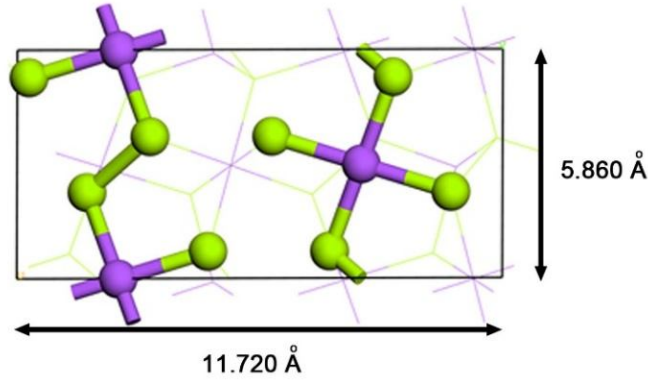

$$R_f(c - \text{CoSe}_2) = \frac{1.1 \text{ mF cm}^{-2}}{0.1 \text{ mF cm}^{-2}} = 10 \quad (5)$$

So the density of surface active sites of *c*-CoSe<sub>2</sub> on geometric area is:

$$\frac{3}{11.720 \times 10^{-8} \text{ cm} \times 5.86 \times 10^{-8} \text{ cm}} \times 10 = 4.37 \times 10^{17} \text{ site cm}^{-2} \quad (6)$$

Therefore, the TOF per site at an overpotential of 330 mV ( $j = 10 \text{ mA cm}^{-2}$ ) is determined as follows:

$$\frac{0.01 \text{ A}}{1 \text{ cm}^2} \times \frac{1 \text{ C}}{1 \text{ s} \cdot 1 \text{ A}} \times \frac{1 \text{ mol}}{96485 \text{ C}} \times \frac{6.02 \times 10^{23} \text{ e}}{1 \text{ mol}} \times \frac{1}{2 \text{ e}} \times \frac{1 \text{ cm}^2}{4.37 \times 10^{17} \text{ atom}} = 0.071 \frac{\text{H}_2/\text{s}}{\text{surface site}} \quad (7)$$

Note that because the nature of the active sites and the real surface area of the *o*-CoSe<sub>2</sub>|P and *c*-CoSe<sub>2</sub> electrocatalysts are difficult to determine accurately, the results provided here is just an indirect estimation.

**Supplementary Note 2: Computational methods.** The Gibbs free-energy ( $\Delta G_{\text{H}^*}$ ) is expressed as:  $\Delta G_{\text{H}^*} = \Delta E_{\text{H}^*} + \Delta E_{\text{ZPE}} - T\Delta S$ . Where  $\Delta E_{\text{H}^*}$ ,  $\Delta E_{\text{ZPE}}$  and  $\Delta S$  are the adsorption energy of atomic hydrogen on the given surface, zero point energy

correction and entropy change of H\* adsorption, respectively. The zero point energy correction can be estimated by the equation  $\Delta E_{ZPE} = E_{ZPE}(H^*) - 1/2E_{ZPE}(H_2)$ , where the  $E_{ZPE}(H_2)$  is calculated to be 0.284 eV, in good agreement to the previous reports<sup>58</sup>.  $\Delta S$  can be calculated by the equation  $\Delta S = S(H^*) - 1/2S(H_2) \approx -1/2S(H_2)$ , due to the negligible of the entropy of hydrogen in adsorbed state. At 1 bar and 300 K,  $T\Delta S$  is about -0.205 eV.  $\Delta E_{H^*}$  is calculated as  $\Delta E_{H^*} = E_{tot} - E_{sub} - 1/2E_{H_2}$ , where  $E_{tot}$  and  $E_{sub}$  are energies of H adsorbed system and the clean given surface, and  $E_{H_2}$  is the energy of H<sub>2</sub> molecular in gas phase.

## Supplementary References

- 1 Liang, L. *et al.* Metallic Single-Unit-Cell Orthorhombic Cobalt Diselenide Atomic Layers: Robust Water-Electrolysis Catalysts. *Angew. Chem. Int. Ed.* **54**, 12004-12008 (2015).
- 2 Wu, R. J. *et al.* Atomic and electronic structure of exfoliated black phosphorus. *J. Vac. Sci. Technol. A* **33**, 060604 (2015).
- 3 Almeida, A. n. J. *et al.* Charge Trapping Defects in CdSe Nanocrystal Quantum Dots. *J. Phys. Chem. C* **120**, 13763-13770 (2016).
- 4 Azcondo, M. T. *et al.* Complex magnetic behaviour of  $\text{Sr}_2\text{CoNb}_{1-x}\text{Ti}_x\text{O}_6$  ( $0 \leq x \leq 0.5$ ) as a result of a flexible microstructure. *Dalton T.* **44**, 3801-3810 (2015).
- 5 Bollig, B., Geysers, K. & Heuken, M. High - resolution scanning transmission electron microscopy (STEM) and electron energy loss spectroscopy (EELS) of  $\text{ZnS}_x\text{Se}_{1-x}/\text{ZnSe}$  Quantum Wells. *Adv. Funct. Mater.* **3**, 183-190 (1994).
- 6 Saadi, F. H. *et al.* Operando Spectroscopic Analysis of CoP Films Electrocatalyzing the Hydrogen-Evolution Reaction. *J. Am. Chem. Soc.* **139**, 12927-12930 (2017).
- 7 Franke, R. & Hormes, J. The P *K*-near edge absorption spectra of phosphates. *Physica. B* **216**, 85-95 (1995).
- 8 Zhang, W. X. *et al.* A hydrothermal synthesis of orthorhombic nanocrystalline cobalt diselenide  $\text{CoSe}_2$ . *Mater. Res. Bull.* **35**, 2403-2408 (2000).
- 9 Gao, M. R., Yao, W. T., Yao, H. B. & Yu, S. H. Synthesis of Unique Ultrathin Lamellar Mesostructured  $\text{CoSe}_2$ -Amine (Protonated) Nanobelts in a Binary Solution. *J. Am. Chem. Soc.* **131**, 7486-7487 (2009).
- 10 Chen, P. Z. *et al.* Phase-Transformation Engineering in Cobalt Diselenide Realizing Enhanced Catalytic Activity for Hydrogen Evolution in an Alkaline Medium. *Adv. Mater.* **28**, 7527-7532 (2016).
- 11 Wu, Z. *et al.* Hierarchically Porous Electrocatalyst with Vertically Aligned Defect-Rich  $\text{CoMoS}$  Nanosheets for the Hydrogen Evolution Reaction in an Alkaline Medium. *ACS Appl. Mater. Inter.* **9**, 5288-5294 (2017).
- 12 Fang, L. *et al.* Tuning Unique Peapod-Like  $\text{Co}(\text{S}_x\text{Se}_{1-x})_2$  Nanoparticles for Efficient Overall Water Splitting. *Adv. Funct. Mater.* **27**, 1701008 (2017).
- 13 Xu, K. *et al.* Regulating Water-Reduction Kinetics in Cobalt Phosphide for Enhancing HER Catalytic Activity in Alkaline Solution. *Adv. Mater.* **29**, 1606980 (2017).
- 14 Hu, C. & Dai, L. Multifunctional Carbon-Based Metal-Free Electrocatalysts for Simultaneous Oxygen Reduction, Oxygen Evolution, and Hydrogen Evolution. *Adv. Mater.* **29**, 1604942 (2017).
- 15 Xu, X. *et al.* A Perovskite Electrocatalyst for Efficient Hydrogen Evolution Reaction. *Adv. Mater.* **28**, 6442-6448 (2016).
- 16 Gao, X. *et al.* Hierarchical  $\text{NiCo}_2\text{O}_4$  Hollow Microcuboids as Bifunctional Electrocatalysts for Overall Water-Splitting. *Angew. Chem. Int. Ed.* **55**, 6290-6294 (2016).
- 17 Jiang, J., Gao, M., Sheng, W. & Yan, Y. Hollow Chevrel-Phase  $\text{NiMo}_3\text{S}_4$  for Hydrogen Evolution in Alkaline Electrolytes. *Angew. Chem. Int. Ed.* **55**, 15240-15245 (2016).
- 18 Shi, H., Liang, H., Ming, F. & Wang, Z. Efficient Overall Water-Splitting Electrocatalysis Using Lepidocrocite  $\text{VOOH}$  Hollow Nanospheres. *Angew. Chem. Int. Ed.* **56**, 573-577 (2017).
- 19 Vrabel, H. & Hu, X. Molybdenum boride and carbide catalyze hydrogen evolution in both acidic and basic solutions. *Angew. Chem. Int. Ed.* **51**, 12703-12706 (2012).



- 20 Stern, L.-A., Feng, L., Song, F. & Hu, X. Ni<sub>2</sub>P as a Janus catalyst for water splitting: the oxygen evolution activity of Ni<sub>2</sub>P nanoparticles. *Energy Environ. Sci.* **8**, 2347-2351 (2015)
- 21 Wu, H. B., Xia, B. Y., Yu, L., Yu, X.-Y. & Lou, X. W. Porous molybdenum carbide nano-octahedrons synthesized via confined carburization in metal-organic frameworks for efficient hydrogen production. *Nat. Commun.* **6**, 6512 (2015).
- 22 Feng, Y., Yu, X. Y. & Paik, U. Nickel cobalt phosphides quasi-hollow nanocubes as an efficient electrocatalyst for hydrogen evolution in alkaline solution. *Chem. Commun.* **52**, 1633-1636 (2016).
- 23 Tang, M. H. *et al.* Nickel-silver alloy electrocatalysts for hydrogen evolution and oxidation in an alkaline electrolyte. *Phys. Chem. Chem. Phys.* **16**, 19250-19257 (2014).
- 24 Xiao, P. *et al.* Molybdenum phosphide as an efficient electrocatalyst for the hydrogen evolution reaction. *Energy Environ. Sci.* **7**, 2624-2629 (2014).
- 25 Kwak, I. H. *et al.* CoSe<sub>2</sub> and NiSe<sub>2</sub> Nanocrystals as Superior Bifunctional Catalysts for Electrochemical and Photoelectrochemical Water Splitting. *ACS Appl. Mater. Inter.* **8**, 5327-5334 (2016).
- 26 Ma, L., Ting, L. R. L., Molinari, V., Giordano, C. & Yeo, B. S. Efficient hydrogen evolution reaction catalyzed by molybdenum carbide and molybdenum nitride nanocatalysts synthesized via the urea glass route. *J. Mater. Chem. A* **3**, 8361-8368 (2015).
- 27 Song, B. *et al.* Tuning Mixed Nickel Iron Phosphosulfide Nanosheet Electrocatalysts for Enhanced Hydrogen and Oxygen Evolution. *ACS Catal.* **7**, 8549-8557 (2017).
- 28 Tian, J., Liu, Q., Asiri, A. M. & Sun, X. Self-supported nanoporous cobalt phosphide nanowire arrays: an efficient 3D hydrogen-evolving cathode over the wide range of pH 0-14. *J. Am. Chem. Soc.* **136**, 7587-7590 (2014).
- 29 Wang, X., Li, W., Xiong, D., Petrovykh, D. Y. & Liu, L. Bifunctional Nickel Phosphide Nanocatalysts Supported on Carbon Fiber Paper for Highly Efficient and Stable Overall Water Splitting. *Adv. Funct. Mater.* **26**, 4067-4077 (2016).
- 30 You, B., Jiang, N., Liu, X. & Sun, Y. Simultaneous H<sub>2</sub> Generation and Biomass Upgrading in Water by an Efficient Noble-Metal-Free Bifunctional Electrocatalyst. *Angew. Chem. Int. Ed.* **55**, 9913-9917 (2016).
- 31 Chen, P. *et al.* Phase-Transformation Engineering in Cobalt Diselenide Realizing Enhanced Catalytic Activity for Hydrogen Evolution in an Alkaline Medium. *Adv. Mater.* **28**, 7527-7532 (2016).
- 32 Liang, Y., Liu, Q., Asiri, A. M., Sun, X. & Luo, Y. Self-Supported FeP Nanorod Arrays: A Cost-Effective 3D Hydrogen Evolution Cathode with High Catalytic Activity. *ACS Catal.* **4**, 4065-4069 (2014).
- 33 Zhu, Y.-P., Liu, Y.-P., Ren, T.-Z. & Yuan, Z.-Y. Self-Supported Cobalt Phosphide Mesoporous Nanorod Arrays: A Flexible and Bifunctional Electrode for Highly Active Electrocatalytic Water Reduction and Oxidation. *Adv. Funct. Mater.* **25**, 7337-7347 (2015).
- 34 Zhang, R. *et al.* Ternary NiCo<sub>2</sub>P<sub>x</sub> Nanowires as pH-Universal Electrocatalysts for Highly Efficient Hydrogen Evolution Reaction. *Adv. Mater.* **29**, 1605502 (2017).
- 35 Hou, Y. *et al.* Ternary Porous Cobalt Phosphoselenide Nanosheets: An Efficient Electrocatalyst for Electrocatalytic and Photoelectrochemical Water Splitting. *Adv. Mater.* **29**, 1701589 (2017).
- 36 Hou, Y. *et al.* Vertically oriented cobalt selenide/NiFe layered-double-hydroxide nanosheets supported on exfoliated graphene foil: an efficient 3D electrode for overall water splitting. *Energy Environ. Sci.* **9**, 478-483 (2016).

- 37 Liu, B. *et al.* Nickel-Cobalt Diselenide 3D Mesoporous Nanosheet Networks Supported on Ni Foam: An All-pH Highly Efficient Integrated Electrocatalyst for Hydrogen Evolution. *Adv. Mater.* **29**, 1606521 (2017).
- 38 Wang, W. Y. *et al.* A self-supported NiMoS<sub>4</sub> nanoarray as an efficient 3D cathode for the alkaline hydrogen evolution reaction. *J Mater. Chem. A* **5**, 16585-16589 (2017).
- 39 Feng, L. L. *et al.* High-index faceted Ni<sub>3</sub>S<sub>2</sub> nanosheet arrays as highly active and ultrastable electrocatalysts for water splitting. *J. Am. Chem. Soc.* **137**, 14023-14026 (2015).
- 40 Sivanantham, A., Ganesan, P. & Shanmugam, S. Hierarchical NiCo<sub>2</sub>S<sub>4</sub> Nanowire Arrays Supported on Ni Foam: An Efficient and Durable Bifunctional Electrocatalyst for Oxygen and Hydrogen Evolution Reactions. *Adv. Funct. Mater.* **26**, 4661-4672 (2016).
- 41 Zhang, J. *et al.* Interface Engineering of MoS<sub>2</sub>/Ni<sub>3</sub>S<sub>2</sub> Heterostructures for Highly Enhanced Electrochemical Overall-Water-Splitting Activity. *Angew. Chem. Int. Ed.* **55**, 6702-6707 (2016).
- 42 Liu, Y. *et al.* Coupling Sub-Nanometric Copper Clusters with Quasi-Amorphous Cobalt Sulfide Yields Efficient and Robust Electrocatalysts for Water Splitting Reaction. *Adv. Mater.* **29**, 1606200 (2017).
- 43 Laursen, A. B. *et al.* Nanocrystalline Ni<sub>5</sub>P<sub>4</sub>: a hydrogen evolution electrocatalyst of exceptional efficiency in both alkaline and acidic media. *Energy Environ. Sci.* **8**, 1027-1034 (2015).
- 44 Jia, Y. *et al.* A Heterostructure Coupling of Exfoliated Ni-Fe Hydroxide Nanosheet and Defective Graphene as a Bifunctional Electrocatalyst for Overall Water Splitting. *Adv. Mater.* **29**, 1700017 (2017).
- 45 Luo, J. *et al.* Water photolysis at 12.3% efficiency via perovskite photovoltaics and Earth-abundant catalysts. *Science* **345**, 1593-1596 (2014).
- 46 Jin, H. *et al.* In situ cobalt-cobalt oxide/N-doped carbon hybrids as superior bifunctional electrocatalysts for hydrogen and oxygen evolution. *J. Am. Chem. Soc.* **137**, 2688-2694 (2015).
- 47 Zhu, Y. P., Ma, T. Y., Jaroniec, M. & Qiao, S. Z. Self-Templating Synthesis of Hollow Co<sub>3</sub>O<sub>4</sub> Microtube Arrays for Highly Efficient Water Electrolysis. *Angew. Chem. Int. Ed.* **56**, 1324-1328 (2017).
- 48 Gong, M. *et al.* Nanoscale nickel oxide/nickel heterostructures for active hydrogen evolution electrocatalysis. *Nat. Commun.* **5**, 4695 (2014).
- 49 Wang, H. *et al.* Bifunctional non-noble metal oxide nanoparticle electrocatalysts through lithium-induced conversion for overall water splitting. *Nat. Commun.* **6**, 7261 (2015).
- 50 Zhang, H. *et al.* Active Sites Implanted Carbon Cages in Core-Shell Architecture: Highly Active and Durable Electrocatalyst for Hydrogen Evolution Reaction. *ACS Nano* **10**, 684-694 (2016).
- 51 Zou, X. *et al.* Cobalt-embedded nitrogen-rich carbon nanotubes efficiently catalyze hydrogen evolution reaction at all pH values. *Angew. Chem. Int. Ed.* **53**, 4372-4376 (2014).
- 52 Hou, Y. *et al.* Efficient Electrochemical and Photoelectrochemical Water Splitting by a 3D Nanostructured Carbon Supported on Flexible Exfoliated Graphene Foil. *Adv. Mater.* **29**, 1604480 (2017).
- 53 Zhang, J. & Dai, L. Nitrogen, Phosphorus, and Fluorine Tri-doped Graphene as a Multifunctional Catalyst for Self-Powered Electrochemical Water Splitting. *Angew. Chem. Int. Ed.* **55**, 13296-13300 (2016).
- 54 Yu, Z. Y. *et al.* A one-dimensional porous carbon-supported Ni/Mo<sub>2</sub>C dual catalyst for efficient water splitting. *Chem. Sci.* **8**, 968-973 (2017).

- 55 McKone, J. R., Sadtler, B. F., Werlang, C. A., Lewis, N. S. & Gray, H. B. Ni–Mo nanopowders for efficient electrochemical hydrogen evolution. *ACS Catal.* **3**, 166-169 (2013).
- 56 Zhang, J. *et al.* Efficient hydrogen production on MoNi<sub>4</sub> electrocatalysts with fast water dissociation kinetics. *Nature Commun.* **8**, 15437 (2017).
- 57 Zhuo, J. Q. *et al.* High-Performance Electrocatalysis for Hydrogen Evolution Reaction Using Se-Doped Pyrite-Phase Nickel Diphosphide Nanostructures. *ACS Catal.* **5**, 6355-6361 (2015).
- 58 Norskov, J. K. *et al.* Trends in the exchange current for hydrogen evolution. *J. Electrochem. Soc.* **152**, 23-26 (2005).
